1 **Title: Distal axotomy enhances retrograde presynaptic excitability onto**  
2 **injured pyramidal neurons via trans-synaptic signaling**

3 **Authors:** Tharkika Nagendran<sup>1,3</sup>, Rylan S. Larsen<sup>2,3,8</sup>, Rebecca L. Bigler<sup>5</sup>, Shawn B.  
4 Frost<sup>6,7</sup>, Benjamin D. Philpot<sup>2,3,4</sup>, Randolph J. Nudo<sup>6,7</sup>, Anne Marion Taylor<sup>1,3,4\*</sup>

5 **Affiliations:**

6 <sup>1</sup> UNC/NCSU Joint Department of Biomedical Engineering, UNC-Chapel Hill, Chapel  
7 Hill, Campus box 7575, NC 27599-7575 USA

8 <sup>2</sup> Department of Cell Biology and Physiology, UNC-Chapel Hill, Campus box 7545,  
9 Chapel Hill, NC 27599-7545 USA

10 <sup>3</sup> UNC Neuroscience Center, Campus box 7250, UNC-Chapel Hill, Chapel Hill, NC  
11 27599-7250 USA

12 <sup>4</sup> Carolina Institute for Developmental Disabilities, Campus box 7255, Chapel Hill, NC  
13 27599-7255 USA

14 <sup>5</sup> Curriculum in Genetics and Molecular Biology, UNC-Chapel Hill, Chapel Hill, NC  
15 27599 USA

16 <sup>6</sup> Landon Center On Aging, University of Kansas Medical Center, 3901 Rainbow Blvd.,  
17 Kansas City, KS 66160 USA

18 <sup>7</sup> Department of Rehabilitation Medicine, University of Kansas Medical Center, 3901  
19 Rainbow Blvd., Kansas City, KS 66160 USA

20 <sup>8</sup> Present address: Allen Institute for Brain Science, 615 Westlake Ave. N, Seattle, WA  
21 98109, USA

22 \*To whom correspondence should be addressed: [anne.marion.taylor@gmail.com](mailto:anne.marion.taylor@gmail.com)

23 **Abstract**

24 Injury of CNS nerve tracts remodels circuitry through dendritic spine loss and hyper-  
25 excitability, thus influencing recovery. Due to the complexity of the CNS, a mechanistic  
26 understanding of injury-induced synaptic remodeling remains unclear. Using microfluidic  
27 chambers to separate and injure distal axons, we show that axotomy causes retrograde  
28 dendritic spine loss at directly injured pyramidal neurons followed by retrograde  
29 presynaptic hyper-excitability. These remodeling events require activity at the site of  
30 injury, axon-to-soma signaling, and transcription. Similarly, directly injured corticospinal  
31 neurons *in vivo* also exhibit a specific increase in spiking following axon injury.  
32 Axotomy-induced hyper-excitability of cultured neurons coincides with elimination of  
33 inhibitory inputs onto injured neurons, including those formed onto dendritic spines.  
34 *Netrin-1* downregulation occurs following axon injury and exogenous netrin-1 applied  
35 after injury normalizes spine density, presynaptic excitability, and inhibitory inputs at  
36 injured neurons. Our findings show that intrinsic signaling within damaged neurons  
37 regulates synaptic remodeling and involves netrin-1 signaling.  
38

## 39 **Introduction**

40 Acquired brain injuries, such as occur in stroke and traumatic brain injury, induce  
41 significant synaptic reorganization, even in uninjured cortical regions remote from the  
42 site of damage <sup>1-3</sup>. This enhanced neural plasticity supports formation of new connections  
43 and expansion of cortical territories, well-described in humans using neuroimaging and  
44 non-invasive stimulation techniques <sup>1, 2, 4, 5</sup>. However, the cellular mechanisms of this  
45 injury-induced plasticity remain largely unknown.

46 In healthy brains, long projection neurons with somatodendritic domains housed  
47 in cerebral cortex extend axons into numerous distant areas of the CNS, including the  
48 spinal cord and the apposing cortical hemisphere. When these remote areas are injured,  
49 long projection axons are damaged and injury signals propagate retrogradely to  
50 somatodendritic domains. Retrograde injury signal propagation leads to somatic  
51 responses such as chromatolysis and new transcription <sup>6, 7</sup>. For example, after damage to  
52 corticospinal axons resulting from spinal cord injury, dendritic spines in motor cortex  
53 undergo time-dependent changes in morphology including decreased spine density and  
54 alterations in spine length and diameter <sup>8</sup>. Loss of local GABAergic inhibition also occurs  
55 at somatodendritic regions following injury, which is thought to unmask preexisting  
56 excitatory connections and result in enhanced excitability <sup>2, 9, 10</sup>. These findings suggest  
57 that a cascade of events occurs following distal axonal injury involving retrograde axon-  
58 to-soma signaling and then trans-synaptic signaling from the injured neuron to uninjured  
59 presynaptic neurons causing synaptic changes and enhanced excitability.

60 Due to the heterogeneity and complexity of the CNS, intrinsic neuronal responses  
61 to distal axon injury and their contributions to synaptic remodeling remain unclear.

62 Reduced preparations are necessary for examining neuron-specific responses and provide  
63 a more experimentally tractable model system to identify and screen drugs to improve  
64 neuronal function following injury. Microfluidic chambers are useful for  
65 compartmentalization of many types of neurons, including cortical and hippocampal  
66 neurons, and allow axons to be injured and manipulated without physically disturbing the  
67 proximal neurons housed within the chamber's somatodendritic compartment<sup>11-13</sup>.  
68 Because brain injury and disease preferentially affect long projection neurons within the  
69 CNS<sup>14, 15</sup>, we sought to determine the progression of events that occur intrinsically in  
70 these neurons following distal axotomy that lead to synaptic remodeling.

71 Here we show that axotomized pyramidal neurons undergo dendritic spine loss  
72 followed by a transsynaptic enhancement in presynaptic excitability. We find that directly  
73 injured neurons preferentially exhibit enhanced excitability and our evidence suggests  
74 that these synaptic remodeling events require retrograde signaling from the site of axon  
75 injury to the nucleus to rapidly activate transcription. Loss of inhibitory inputs coincides  
76 with enhanced presynaptic excitability. We identified *netrin-1* as significantly  
77 downregulated following axotomy and found that application of exogenous netrin-1  
78 protein several hours after axotomy, restored spine density and normalized presynaptic  
79 excitability, including the fraction of inhibitory inputs onto injured neurons.

80

## 81 **Results**

### 82 *In vitro model to study axon injury of pyramidal neurons*

83 To investigate how distal axon injury remodels synapses contacting injured

84 neurons, we used a microfluidic approach to compartmentalize cultured neurons.  
85 Microfluidic chambers containing microgroove-embedded barriers approximately 900  
86  $\mu\text{m}$  in length were used to compartmentalize axons independently from dendrites and  
87 somata of rat central neurons as demonstrated previously (**Supplementary Fig. 1a**)<sup>11, 12,</sup>  
88 <sup>16</sup>. Using this approach we subjected neurons to distal axotomy ~1 mm away from their  
89 physically undisturbed dendrites and somata<sup>11, 16</sup>. We used hippocampal neurons  
90 harvested from embryonic rats to generate a more consistent, enriched population of  
91 pyramidal neurons (85-90% pyramidal) compared with similarly harvested cortical  
92 neurons. Further, hippocampal neurons exhibit morphology characteristic of maturing  
93 pyramidal neurons *in vivo*<sup>17</sup>; the remaining hippocampal neurons are mostly inhibitory  
94 GABAergic interneurons<sup>18</sup>. To identify neurons with axons projecting into the axonal  
95 compartment, we retrogradely labeled neurons by applying a G-deleted rabies virus  
96 expressing fluorescent proteins (incompetent for trans-synaptic transfer) to the axonal  
97 compartment and characterized the morphology of the labeled neurons. We found that  
98 94% (42 of 45) of virally-labeled neurons were pyramidal neurons and the remaining  
99 were unclassifiable (**Fig. 1a**). When these neurons were cultured within the microfluidic  
100 chamber and axotomized within the axonal compartment (**Fig. 1b**), there was no loss in  
101 viability post-axotomy (**Supplementary Fig. 1**), similar to *in vivo* findings<sup>19</sup>, and injured  
102 axons regrew<sup>11, 16</sup>. Supporting the use of this approach, we previously found that  
103 axotomy performed within the microfluidic chambers induced rapid expression of the  
104 immediate early gene *c-fos*<sup>11</sup>, as reported *in vivo*<sup>20</sup>. Neurons labeled with retrograde  
105 tracer, Alexa 568-conjugated cholera toxin, also showed a significant decrease in Nissl  
106 staining in the somata reflective of chromatolysis at 24 h post-axotomy<sup>21</sup>

107 **(Supplementary Fig. 1).** Together, this model recapitulated key features of axotomy *in*  
108 *vivo*.

109

110 *Spine density decreases after distal axon injury*

111         Decreased spine density is seen *in vivo* in models of traumatic brain injury and  
112 spinal cord injury<sup>22, 23</sup>. To determine whether similar structural changes occur in cultured  
113 pyramidal neurons following distal axotomy, we quantified spine density within the  
114 somatodendritic compartment of axotomized neurons that were retrogradely labeled  
115 using mCherry rabies virus. Spine density significantly declined 24 h and 48 h post-  
116 axotomy compared to before axotomy (**Fig. 1c,d**). In contrast, uninjured control neurons  
117 showed increased spine density as expected to occur during normal maturation (**Fig.**  
118 **1c,d**).

119         We next analyzed specific spine types that were lost. We found a preferential loss  
120 in the density of thin and stubby spines at both 24 h and 48 h post-axotomy compared to  
121 pre-axotomy (**Fig. 2a**). The density of mushroom spines remained stable at both 24 h and  
122 48h after axotomy, unlike in the uninjured control neurons where spine density of all  
123 spine types increased. The reduction in spine density following axotomy suggests that  
124 either dendritic spines were being eliminated or, conversely, that there was a reduction in  
125 new spine formation following axotomy. Further analysis of our before and after  
126 axotomy images revealed that axotomy caused both a significant increase in the  
127 percentage of spines eliminated *and* a significant reduction in the percentage of new  
128 spines formed 24 h post-axotomy (**Fig. 2b-d**). Thus, axotomy affected both elimination  
129 and formation of spines to result in lower dendritic spine density.

130

131 *Increased synaptic vesicle release rate follows axon injury*

132 To further evaluate how synapses are modified following distal axon injury, we  
133 next investigated whether presynaptic release properties were altered at synapses onto  
134 injured neurons. To address this question, we retrogradely infected neurons using a  
135 modified eGFP rabies virus to label injured neurons and then used FM dyes to optically  
136 measure synaptic vesicle release onto these directly-injured neurons (**Fig. 3a**). The use of  
137 FM dyes provided us with a non-selective, unbiased method to label a majority of  
138 presynaptic terminals within the somatodendritic compartment<sup>24</sup>. FM puncta highly  
139 colocalized with synapsin1 immunolabeling (93%), which is present at both inhibitory  
140 and excitatory terminals, validating our FM dye loading strategy (**Supplementary Fig.**  
141 **2**). We examined the synaptic vesicle release rate of FM puncta that colocalized with  
142 axotomized eGFP expressing neurons. At 24 h post-axotomy, there was no change in  
143 synaptic vesicle release rate compared to eGFP expressing uninjured control samples  
144 (**Fig. 3b,c**). In contrast, 48 h after axotomy synaptic vesicle release rate was significantly  
145 enhanced (**Fig. 3c**). Further, the FM decay time constant,  $\tau$ , which has been inversely  
146 correlated with release probability<sup>25</sup> was significantly reduced at 48 h post-axotomy  
147 (control:  $124.8 \text{ s} \pm 5.487$  versus axotomy:  $78.65 \text{ s} \pm 3.922$ ;  $p < 0.0001$ ). These results were  
148 similar to those obtained by examining the entire image field of FM puncta closest to the  
149 barrier region within the somatodendritic compartment where a large percentage of  
150 axotomized neurons reside (**Supplementary Fig. 3**). The difference in presynaptic  
151 release rate persisted, though modestly, at 4 d post-axotomy in these cultured neurons  
152 (control:  $95.14 \text{ s} \pm 1.282$  versus axotomy:  $77.19 \text{ s} \pm 1.165$ ;  $p < 0.0001$ ; **Supplementary**

153 **Fig. 3).** Together, these data suggest a delayed and persistent increase in synaptic vesicle  
154 release rate that occurred following dendritic spine loss.

155         Next, we performed two control experiments to determine (1) whether cortical  
156 cultures, which have more neuron variability than hippocampal cultures, would behave  
157 similarly to hippocampal cultures used in our experimental model, and (2) whether  
158 axotomy of axons forming synapses onto postsynaptic targets would yield similar effects  
159 as axotomy of untargeted axons. First, we performed the FM unloading experiments with  
160 cortical neurons harvested from embryonic rats and found that these cultures showed  
161 similar changes in presynaptic release 48 h post-axotomy (**Supplementary Fig. 3**). To  
162 address the second question, we added a small number of target neurons to the axonal  
163 compartment during cell plating. We previously demonstrated that synapses form  
164 between two neuron populations plated into opposing compartments<sup>12</sup>. Axotomy of this  
165 targeted population of neurons resulted in similar changes in presynaptic release rate as  
166 axotomy of untargeted axons (**Supplementary Fig. 3**).

167         Dendritic spine density is lower following injury, suggesting fewer synapses,  
168 thus, we next wondered whether the balance of responsive to unresponsive presynaptic  
169 terminals might be altered following axotomy to account for the enhancement in  
170 excitability. We measured the proportion of FM puncta that unloaded (responsive) or did  
171 not unload (unresponsive) in response to field stimulation using extracellular electrodes<sup>24</sup>  
172 (**Fig. 3d**). At 24 h post-axotomy when spine density was decreased, we observed no  
173 change in the fraction of responsive and unresponsive FM puncta compared to uninjured  
174 controls (**Fig. 3d**). However at 48 h post-axotomy, a significantly larger proportion of  
175 puncta were responsive compared to puncta within uninjured control chambers (**Fig. 3d**).



176 Further, at 48 h post-axotomy we found an overall decrease in the number of loaded FM  
177 puncta (**Fig. 3e**). Together, our data suggest that distal axon injury leads to an overall  
178 decrease in synapses, including the number of presynaptic terminals, but that the smaller  
179 number of presynaptic terminals is more responsive to stimulation.

180

### 181 *Enhanced glutamate release at synapses onto injured neurons*

182 Our results support that distal axotomy triggers a retrograde and trans-synaptic  
183 cascade of events leading to enhanced neurotransmitter release rate. To confirm this, we  
184 performed electrophysiological recordings of AMPAR-mediated miniature excitatory  
185 postsynaptic currents (mEPSCs) from axotomized neurons 48 h post-axotomy and their  
186 age-matched uninjured controls. Biocytin was used to fill neurons following each  
187 recording to determine whether neurons extended axons into the axonal compartment and  
188 were axotomized. Axotomized neurons had a significant increase in mEPSC frequency,  
189 confirming our FM data and supporting an increased rate of presynaptic glutamate release  
190 (**Fig. 3f,g**). Membrane properties were equivalent between axotomized and uninjured  
191 control neurons, demonstrating that the health of these axotomized neurons was not  
192 substantially compromised (**Supplementary Table 1**). We observed a trend towards an  
193 increase in mEPSC amplitude following axotomy, however this effect was not significant  
194 (**Fig. 3g**).

195 We next wondered if the increased spontaneous release rate of glutamate was  
196 specific to directly injured neurons or more globally affected neighboring, uninjured  
197 neurons. To address this, we quantified mEPSC frequency between uncut and cut neurons  
198 within the same axotomized chamber. In recordings from directly injured neurons,

199 axotomy specifically increased mEPSC frequency. However, neighboring uninjured  
200 neurons that did not extend axons into the axonal compartment, did not have an increased  
201 mEPSC frequency (**Fig. 3h**). To further examine the effects of direct injury to  
202 axotomized neurons, we quantified FM release rate at nearby uninjured neurons that were  
203 not infected with the retrograde eGFP rabies virus. We found that the release rate was  
204 significantly decreased at these locations compared with synapses on directly axotomized  
205 neurons and not significantly different than at control uninjured neurons labeled with  
206 eGFP rabies virus (**Fig. 3i**). These observations confirmed that axotomy altered  
207 glutamatergic synaptic input onto injured neurons. Further, directly injured neurons trans-  
208 synaptically influenced presynaptic glutamate release without affecting nearby synapses  
209 at uninjured neurons.

210

### 211 *SCI induces persistent and enhanced firing in layer Vb*

212 To evaluate the *in vivo* relevance of our findings, we sought to determine whether  
213 distal injury of long projection neurons *in vivo* would preferentially induce enhanced  
214 excitability in these injured neurons. To do this, we wanted to use an *in vivo* model in  
215 which axonal damage occurs far from somata to minimize other effects of injury (e.g.,  
216 inflammation, metabolic changes). We used a rat SCI model described previously<sup>26</sup> in  
217 which animals were subjected to a spinal cord contusion injury at thoracic level T9-10,  
218 and recording electrodes were implanted into the neurophysiologically-identified  
219 hindlimb motor cortex in ketamine-anesthetized animals. Electrode sites on single-shank  
220 microelectrode arrays (Neuronexus, Ann Arbor, MI) extended through cortical layers V  
221 and VI, allowing simultaneous recording throughout these cortical layers. Effective injury

222 to the corticospinal neurons innervating hindlimb motor neuron pools in the spinal cord  
223 was confirmed by stimulating electrode sites and confirming loss of evoked hindlimb  
224 movement. At each cortical location, 5 minutes of neural data was collected for offline  
225 analysis. At the end of the procedure, neural spikes were discriminated using principle  
226 component analysis. We examined firing rates<sup>27</sup> within layers Va, Vb, and VI between 4  
227 weeks and 18 weeks post-SCI and compared the data to sham control animals. We found  
228 that the firing rate within layer Vb was significantly increased after SCI compared to  
229 sham controls (**Fig. 4**). Layer Vb contains the highest density of corticospinal somata,  
230 with estimates of nearly 80% of large pyramidal cells<sup>28</sup>. Also, after spinal cord injury,  
231 chromatolytic changes occur preferentially in layer Vb<sup>29</sup>. In layers Va and VI, which  
232 have few (layer Va) or no (layer VI) corticospinal neurons, we found that firing rates  
233 were not statistically different between SCI animals and sham controls. Together, these  
234 data confirm a persistent increase in spontaneous firing rates in remotely injured  
235 corticospinal neurons, and support the relevance of our *in vitro* model system.

236

### 237 *Axotomy eliminates GABAergic terminals onto injured neurons*

238 Loss of inhibition following distal injury contributes to enhance excitability *in*  
239 *vivo*, thus we wanted to test whether axotomy in our culture system results in a similar  
240 loss of inhibitory terminals. We performed retrospective immunostaining to determine  
241 the fraction of vGLUT1 or GAD67-positive FM puncta at 48 h post-axotomy (**Fig. 5a,b**).  
242 We found that axotomy did not alter the fraction of glutamatergic terminals, but  
243 significantly diminished the fraction of GAD67-positive puncta within the  
244 somatodendritic compartment. Further, we examined the fraction of vGLUT1 or vGAT

245 puncta colocalized with axotomized neurons labeled with an eGFP rabies virus (**Fig. 5c**).  
246 These results confirmed the preferential absence of inhibitory terminals following  
247 axotomy while the fraction of vGLUT1 puncta remained equivalent to uninjured control  
248 neurons.

249 To determine whether inhibitory synapses were functionally altered following  
250 axotomy, we recorded miniature inhibitory postsynaptic currents (mIPSCs) from  
251 axotomized and uninjured chambers 48h post-axotomy (**Fig. 5d-f**). We found that  
252 mIPSCs were more frequent in axotomized cultures compared with uninjured neurons,  
253 suggesting that while there are fewer inhibitory terminals, the remaining terminals have  
254 an increased rate of spontaneous GABA release. We next asked whether this change in  
255 inhibitory synapse function was restricted to directly injured neurons. Within the  
256 axotomized cultures, we compared both cut and uncut neurons and found that the mIPSC  
257 frequency was increased in both groups, but was not different between the directly  
258 axotomized neurons and their uncut neighbors. This suggests that the alteration of  
259 inhibitory synaptic transmission following axotomy affects both directly injured and  
260 neighboring, uninjured neurons.

261 Although the majority of GABAergic synapses are found on dendritic shafts or  
262 cell bodies, a minor population is also found on dendritic spines<sup>30,31</sup> (**Supplementary**  
263 **Fig. 4**). Inhibitory synapses formed on dendritic spines allow for compartmentalization of  
264 dendritic calcium levels involved in regulation of neuronal activity<sup>32,33</sup>. To investigate  
265 whether dendritic spines receiving inhibitory inputs (i.e., inhibited spines) are lost  
266 following axotomy, we quantified the number of inhibitory and excitatory presynaptic  
267 terminals onto spines of cultured pyramidal neurons using retrospective immunostaining

268 for inhibitory (vGAT) and excitatory (vGLUT1) synapse markers. We found a significant  
269 decrease in the fraction of vGAT-positive spines at 48h post-axotomy compared to  
270 uninjured control (**Fig. 5g-i**) with no significant influence on glutamatergic spines.  
271 Together, our data suggest that axotomy caused a preferential loss of inhibitory terminals  
272 onto axotomized neurons, including inhibitory terminals formed onto dendritic spines,  
273 and that increased spontaneous GABAergic transmission might compensate to some  
274 degree for these lost terminals.

275

### 276 *Local activity and transcription regulate remodeling*

277       Efficient axon regeneration requires signaling from the site of injury to the  
278 nucleus in multiple model systems <sup>6</sup>, yet the signaling events required for synaptic  
279 remodeling following distal axotomy remain unclear. Breach of the axonal membrane  
280 following axon injury causes an influx of calcium and sodium ions into the intra-axonal  
281 space, potentially influencing signaling to the nucleus and gene expression. To determine  
282 whether local influx of sodium and calcium ions at the time of injury is required for  
283 axotomy-induced spine loss, we performed axotomy within the axonal compartment in  
284 which axons were treated with a local activity blockade during axotomy. This local  
285 activity blockade solution (ABS) included low-Ca<sup>2+</sup>, high-Mg<sup>2+</sup>, and TTX (0.5 mM  
286 CaCl<sub>2</sub>, 10 mM MgCl<sub>2</sub>, 1 μM TTX) to prevent influx of sodium and reduce calcium  
287 influx. This local activity blockade was applied solely to the axonal compartment for 1 h  
288 during axotomy. We labeled neurons extending axons into the axonal compartment using  
289 a retrograde eGFP rabies virus and quantified spine density before and 24 h following  
290 axotomy and compared these measurements to cultures with vehicle applied to axons

291 during axotomy (**Fig. 6a,b**). Strikingly, we found that local activity blockade at the injury  
292 site prevented axotomy-induced spine loss. These data suggest that local activity instructs  
293 retrograde signaling and spine loss.

294 To determine whether injury-induced transcription is required for these trans-  
295 synaptic changes, we treated the somatodendritic compartment with the reversible  
296 transcriptional blocker DRB 15 min prior to axon injury and removed the drug 45  
297 minutes later. We found that blocking transcription during this brief time was sufficient  
298 to prevent axotomy-induced spine loss 24 h post-axotomy compared with similarly  
299 treated uninjured control chambers (**Fig. 6c**). Further, DRB treatment at the time of injury  
300 prevented significant changes in the proportion of responsive FM puncta (**Fig. 6d**) and in  
301 synaptic vesicle release rate 48 h post-axotomy (**Fig. 6e**). However, action potential  
302 blockade with TTX in the somatodendritic compartment for ~1 h at the time of injury did  
303 not affect injury-induced changes in presynaptic release or the proportion of responsive  
304 puncta 48 h after axotomy (**Fig. 6f,g**). Further, application of HBS or DMSO as  
305 respective vehicle controls to TTX or DRB treatments did not alter injury-induced  
306 increase in presynaptic release. We conclude that both local activity at the site of injury  
307 and a transcriptional response were critical mediators of the delayed trans-synaptic  
308 changes in presynaptic release properties following distal axon injury.

309

### 310 *Differential gene expression at 24 h post-axotomy*

311 Our data show that a transcriptional response was required immediately after  
312 axotomy to induce retrograde changes in synaptic vesicle release onto injured neurons.  
313 To identify genes that might mediate this process within a longer therapeutically-relevant

314 time window, we performed a gene expression study to identify differentially expressed  
315 transcripts within the somatodendritic compartment at 24 h post-axotomy compared to  
316 uninjured controls (**Supplementary Fig. 5**). We found 615 transcripts that were  
317 significantly changed following injury (one-way between-subject ANOVA,  $p < 0.05$ )  
318 (**Fig. 7a; Supplementary Table 2**). Confirming that the transcription response *in vitro*  
319 recapitulated *in vivo* findings, we found Jun upregulated 1.41 fold in our microfluidic  
320 cultures 24 h post-axotomy<sup>19</sup>.

321

### 322 *Netrin-1 mRNA down-regulated post-axotomy*

323 Next we sought to identify potential trans-synaptic mediators that may influence  
324 synaptic vesicle release at synapses onto injured neurons. We focused on differentially  
325 expressed transcripts that are known to localize to cell-cell contacts, such as synapses  
326 (**Supplementary Table 3**). We identified netrin-1 (*Ntn1*) as significantly downregulated  
327 24 h following axotomy, consistent with published findings that netrin family proteins are  
328 downregulated following injury in adult rats<sup>34</sup> (**Fig. 7b**). Netrin-1 is a secreted axon  
329 guidance and synaptogenic cue that is enriched at mature dendritic spines<sup>35</sup> where it  
330 induces clustering of its receptor, DCC, and enhances synapse maturation<sup>36</sup>. To confirm  
331 that *Ntn1* expression is downregulated following nerve injury *in vivo*, we analyzed  
332 microarray data from a previously published study which examined cortical gene  
333 expression from retrograde labeled layer V cortex of young adult rats (2 months)  
334 subjected to either sham injury or spinal cord hemisection at thoracic level 8<sup>37</sup> (**Fig. 7c**).  
335 Our analysis of this raw data confirmed that spinal cord injury significantly reduced  
336 netrin-1 expression in cortical layer V by 7 days, consistent with our *in vitro* findings.

337 Together, the significant decrease in *Ntn1* expression both *in vitro* and *in vivo* suggests a  
338 reliable response induced by distal axonal damage.

339

340 *Exogenous netrin-1 normalizes injury-induced changes*

341 The downregulation of netrin-1 following injury led us to ask whether adding  
342 exogenous netrin-1 might rescue, to some degree, the axotomy-induced synaptic changes.  
343 To test this we applied exogenous netrin-1 to the somatodendritic compartment 40 h after  
344 axotomy and evaluated the resulting changes in spine density, synaptic vesicle  
345 responsiveness, and disinhibition. We performed live imaging of somatodendritic  
346 domains before and after axotomy to measure spine density changes and found that  
347 netrin-1 treatment for 8 h was sufficient to normalize spine density to pre-axotomy levels  
348 (**Fig. 8a,b**). We then used FM dyes to compare presynaptic release properties between  
349 axotomized and uninjured controls. Exogenous netrin-1 increased the total number of FM  
350 puncta at 48 h post-injury to levels found in uninjured controls and reduced the  
351 percentage of responsive puncta to levels found in uninjured controls (**Fig. 8c,d**). We  
352 next tested whether netrin-1 might rescue axotomy-induced disinhibition. Netrin-1  
353 treatment following axotomy normalized the density of inhibitory terminals (vGAT  
354 labeled) at axotomized neuron without significantly altering the density of glutamatergic  
355 terminals (vGLUT1 labeled) (**Fig. 8e,f**).

356 Because DCC protein levels parallel netrin-1 expression changes<sup>38,39</sup>, we next  
357 confirmed that DCC levels were downregulated at synapses formed onto the  
358 somatodendritic domain of axotomized neurons (**Fig. 8g,h**). Local synaptic DCC  
359 immunofluorescence at spines of axotomized neurons were decreased at 48 h post-injury.



360 Further, application of exogenous netrin-1 normalized synaptic DCC levels to that similar  
361 to uninjured controls (**Fig. 8g,h**).

362 If downregulation of netrin-1 signaling regulates axotomy-induced synaptic  
363 remodeling, we would expect that blocking netrin-1 signaling in uninjured neurons would  
364 be sufficient to cause both reductions in spine density and the density of inhibitory  
365 terminals. Spine density in uninjured cultures treated with a DCC function blocking  
366 antibody for 24 h was significantly reduced after treatment compared to control chambers  
367 treated with an IgG antibody (**Fig. 8i**). Further, we found that blocking DCC was  
368 sufficient to cause a reduction in the density of vGAT puncta, but not vGLUT1 puncta,  
369 per eGFP-filled neuron area (**Fig. 8j**). Together, our data suggest that netrin-1 signaling  
370 may play a critical role in regulating synaptic remodeling following axonal damage,  
371 including in modulating inhibition following injury.

372

## 373 **Discussion**

374 While axon regeneration following injury is extensively studied, much less is  
375 known about how proximal neurons within the mammalian brain are affected following  
376 axonal damage<sup>40</sup> and more specifically how synapses onto injured neurons are  
377 remodeled. We used a model system to enable the study the cellular mechanisms of  
378 synaptic remodeling following axon injury; this model recapitulated several hallmarks of  
379 neurons subjected to axonal injury *in vivo*, including chromatolysis<sup>6,21</sup>, retrograde spine  
380 loss<sup>4,22,23</sup>, retrograde hyper-excitability<sup>1-3</sup>, and disinhibition<sup>2,9,10</sup>. Axotomy-induced  
381 transcriptional changes in this *in vitro* model are also consistent with *in vivo* findings<sup>7,20</sup>.  
382 Because of the ability to separate neuronal compartments, this tool facilitates the

383 investigation of axotomy-induced retrograde signaling intrinsic to neurons and the  
384 resulting effects to interneuronal communication.

385 Our results suggest that retrograde remodeling requires local signaling at the site  
386 of injury mediated by sodium and/or calcium influx to activate a rapid transcriptional  
387 response. Both post-synaptic dendritic spine loss and trans-synaptic changes in  
388 presynaptic inputs required immediate transcription. Our data is consistent with axonal  
389 injury signaling in other non-CNS model systems <sup>6</sup>. Localized reversal of a sodium  
390 calcium exchanger (NCX) at the site of injury may amplify calcium influx and contribute  
391 to long range signaling <sup>41</sup>. In peripheral neurons calcium waves can locally propagate to  
392 the nucleus to induce a transcriptional response <sup>42</sup>. The localized influx of calcium may  
393 be a priming effect for retrograde transport of signaling complexes required to initiate  
394 transcription <sup>6</sup>.

395 Our data showed that axotomy-induced spine loss was followed by a specific loss  
396 of inhibitory inputs. Interestingly, specific loss of inhibitory, and not excitatory, terminals  
397 suggests that preserved excitatory inputs may remain available for some period of time  
398 following injury. Because of the spine loss, these excitatory inputs could form shaft  
399 synapses or some may become orphan presynaptic sites following injury. Large headed  
400 dendritic spines could also receive multiple excitatory inputs, stabilizing them, and  
401 allowing them to find new partners over time. The increased spontaneous release of  
402 glutamate at injured neurons 48 h following axotomy, without an increase in the number  
403 of excitatory terminals, suggests that the maintained excitatory inputs may contribute to  
404 the hyper-excitability post-injury.

405           The sequential post- and then pre- synaptic changes following axotomy suggest a  
406 trans-synaptic mechanism. These post- and then pre- synaptic changes are consistent with  
407 the involvement of synaptic homeostasis where retrograde molecules are released post-  
408 synaptically to influence presynaptic release. Further support for the involvement of  
409 trans-synaptic mechanisms comes from our observation of an increase in spontaneous  
410 neurotransmitter release localized at excitatory synapses onto axotomized neurons, but  
411 not at neighboring excitatory synapses onto uninjured neurons. The significantly  
412 enhanced firing rate following SCI in cortical layer Vb, but not layers Va and VI,  
413 provides additional support for this specificity. Interestingly, we also found an increase in  
414 spontaneous release at inhibitory terminals, although fewer inhibitory terminals remain  
415 following axotomy. The increase in GABA release rate may serve as compensation  
416 mechanism for the axotomy-induced hyper-excitability.

417           Dendritic release of secreted proteins (e.g., BDNF, NT-3 and NT-4) and diffusible  
418 molecules, such as nitric oxide, can trans-synaptically regulate neurotransmitter release  
419 <sup>43-45</sup>. Injury of motoneuron projections to myocytes caused synaptic remodeling of inputs  
420 to motoneurons which was influenced by nitric oxide synthesis <sup>46</sup>. While these previously  
421 reported trans-synaptic signaling pathways were not detectably altered in our microarray  
422 analysis, we did identify the secreted protein, netrin-1, as significantly downregulated in  
423 our axotomized cultures 24 h post- axotomy. Downregulation of netrin-1 gene expression  
424 was further confirmed *in vivo* through an analysis of independently acquired microarray  
425 data. Netrin-1 is secreted locally from target cells and signals DCC receptors that are  
426 present along axons <sup>36</sup> to influence presynaptic release and maturation <sup>47, 48</sup>. While  
427 netrin-1 signaling is historically thought of in a developmental context, there is increasing

428 evidence of the importance of netrin-1 signaling in the adult CNS. Consistent with our *in*  
429 *vitro* findings, netrin family members are downregulated *in vivo* following spinal cord  
430 injury in adult rats<sup>34, 49</sup> and DCC remains persistently low after 7 months post-injury in  
431 adult rats<sup>34</sup>. Netrin-1 has also recently been tested as a potential therapeutic agent  
432 following injury and has been shown to improve recovery outcomes<sup>50-52</sup>.

433         We found that adding exogenous netrin-1 one and a half days after axotomy  
434 dramatically increased spine density and the density of inhibitory terminals to levels  
435 found in uninjured controls. The restoration of inhibitory terminals in axotomized  
436 samples treated with netrin-1 is a novel and exciting finding. Evidence from *C.elegans*  
437 confirms a link between netrin-1 signaling and stabilization of GABA<sub>A</sub> receptors<sup>53</sup>. Yet,  
438 it remains unclear how netrin-1 signaling modulates inhibitory input and will be an  
439 important topic for future studies. In contrast to previous reports, we found that there was  
440 no reduction in the number of vGLUT1 positive terminals when blocking DCC<sup>36</sup>, which  
441 could be explained by our shorter treatment times with DCC function blocking antibody.

442         Axonal damage within the CNS occurs in numerous disorders and diseases, but  
443 little is known about the overall impact on cortical circuit function. Importantly, our cell-  
444 based findings have broader applicability beyond spinal cord injury to numerous  
445 conditions where axonal damage is prevalent, such as other forms of traumatic brain  
446 injury, Alzheimer's disease, and multiple sclerosis. Further, remodeling is enhanced in  
447 embryonic or neonatal neurons, making the use of an *in vitro* approach using these  
448 neurons, together with *in vivo* models, advantageous for identifying pathways  
449 instrumental for neurological recovery<sup>54</sup>.

450

## 451 **Materials and Methods**

452 *Hippocampal cultures.* Animal procedures were carried out in accordance with  
453 the University of North Carolina at Chapel Hill Institutional Animal Care and Use  
454 Committee (IACUC). Dissociated hippocampal cultures were prepared from Sprague  
455 Dawley rat embryos (E18-E19) as previously described<sup>11,24</sup> with the following  
456 modifications. Hippocampal tissue was dissected in dissociation media (DM) containing  
457 82 mM Na<sub>2</sub>SO<sub>4</sub>, 30 mM K<sub>2</sub>SO<sub>4</sub>, 5.8 mM MgCl<sub>2</sub>, 0.25 mM CaCl<sub>2</sub>, 1 mM HEPES, 20 mM  
458 Glucose and 0.001% Phenol red. For enzymatic digestion, equal volumes of TrypLE  
459 Express (Invitrogen) and DM were added to the tissue and incubated at 37°C for 8 min.  
460 Tissue was then rinsed and gently triturated in neuronal culture media consisting of  
461 Neurobasal media (Invitrogen) supplemented with 1x B27 (Invitrogen), 1x Antibiotic-  
462 antimycotic (Invitrogen), 1x Glutamax (Invitrogen). Dissociated cells were resuspended  
463 in neuronal culture media to yield 12x10<sup>6</sup> cells per ml.

464  
465 *Microfluidic chambers.* Poly(dimethylsiloxane) (PDMS) microfluidic chambers  
466 were replica molded from microfabricated master molds as described previously<sup>11</sup>. All  
467 experiments used chambers with 900 μm long microgrooves to separate the  
468 somatodendritic and axonal compartments as described previously<sup>11,16,24</sup>. Microfluidic  
469 chambers were placed onto glass coverslips coated with 500-550 kDa Poly-D-Lysine  
470 (BD Biosciences). Approximately ~90,000 cells were plated into the somatodendritic  
471 compartment and axons extended into the adjacent axonal compartment after 5-7 days of  
472 culture. Axotomy was performed between 11 and 15 days in vitro (DIV) according to  
473 previously published procedures<sup>11,16</sup>. Briefly, media was first removed from the axonal

474 compartment and stored for future use. The axonal compartment was then aspirated until  
475 completely devoid of fluid. The stored culture media was then returned immediately to  
476 the axonal compartment for the duration of the culture time. Microfluidic devices with  
477 equivalent viable cell populations were randomly chosen for either axotomy or uninjured  
478 control groups.

479

480 *Retrograde labeling.* Retrograde labeling was performed using either modified  
481 cholera toxin or rabies virus. Cholera Toxin Subunit B Alexa Fluor 488 or 568 (Life  
482 technologies, Molecular Probes; 1  $\mu\text{g}$  in 200  $\mu\text{l}$  of neuronal culture media) was added to  
483 the axonal compartment of the microfluidic chamber and incubated for  $\sim 15$  h at  $37^\circ\text{C}$ .  
484 After 15 h of incubation, the axonal compartment media was removed, rinsed and  
485 replaced using fresh neuronal culture media before performing axotomy or imaging.

486 G-deleted Rabies-mCherry or eGFP virus<sup>55</sup> (Salk Institute;  $1 \times 10^5$  viral units) in  
487 50  $\mu\text{l}$ - conditioned media was added to the axonal compartment of each chamber and  
488 incubated for 2h at  $37^\circ\text{C}$ . Conditioned media was added back to the axonal compartments  
489 following two washes with fresh NBE media. Chambers were maintained in  $37^\circ\text{C}$   
490 incubator for  $\sim 48$  h until fluorescence expression was visible.

491

492 *Cell viability assay.* Dead cells were labeled using SYTOX Green (Invitrogen) at  
493 a final concentration of 1  $\mu\text{M}$  and all cell nuclei were labeled with NucBlue Hoechst  
494 Stain (Invitrogen). Cells were incubated with SYTOX/Hoechst solution simultaneously in  
495 1x PBS for 5 min at  $37^\circ\text{C}$ , washed with PBS, and fixed with 4% paraformaldehyde (PFA)  
496 in PBS containing 40 mg/ml sucrose, 1  $\mu\text{M}$   $\text{MgCl}_2$  and 0.1  $\mu\text{M}$   $\text{CaCl}_2$  for 15 min at room

497 temperature (RT). Coverslips were then rinsed three times with PBS and mounted onto  
498 the glass slide using Fluoromount G (Southern Biotech). SYTOX positive (Sytox<sup>+</sup>) cells  
499 were manually counted in ImageJ using sum projected z-stack confocal images. Percent  
500 cell viability is calculated using  $[(\text{Hoechst} - \text{Sytox}^+) / \text{Hoechst}] * 100$ .

501

502 *Nissl Staining.* Neuronal cultures retrogradely labeled with Cholera Toxin were  
503 either axotomized or left uninjured. PDMS chambers were carefully lifted off from PDL  
504 coated coverslips 24 h post-axotomy. Cultures on the coverslips were quickly rinsed  
505 twice with PBS, fixed with 4% PFA for 30 min at RT, washed twice in PBS, and  
506 incubated in 0.1% Triton X-100/PBS for 10 min at RT. Cultures were incubated for 20  
507 min in NeuroTrace 500/525 Green Fluorescent Nissl Stain (1:100; Invitrogen) and  
508 washed for 10 min in 0.1% Triton X-100/PBS. Cell nuclei were stained with DAPI  
509 (Sigma-Aldrich), rinsed three times in PBS, and then the coverslip was mounted onto a  
510 microscope slide using Fluoromount G.

511

512 *Immunocytochemistry.* PFA fixed neuronal cultures were permeabilized in 0.25%  
513 Triton X-100 and blocked in 10% normal goat serum for 15 min each. Coverslips were  
514 incubated with anti-MAP2 (1:1000; Millipore # AB5622), anti-beta tubulin III  
515 (1:2000; Aves # TUJ), anti-GAD67 (1:2000; Aves labs # GAD), anti-vGLUT1 (1:100;  
516 NeuroMab, clone N28/9, cat. # 75-066), anti-vGAT (1:1000; Synaptic Systems # 131  
517 003), anti-DCC (1:100; Calbiochem # OP45), or anti-synapsin1 (1:500; Calbiochem #  
518 574778) primary antibodies in 1% blocking solution for overnight at 4°C. Coverslips  
519 were then incubated with goat anti-rabbit or goat anti-mouse or anti-chicken secondary

520 antibodies conjugated to Alexa-fluorophores (1:1000; Invitrogen) for 1h at RT.

521 Following PBS washes coverslips were mounted onto the glass slide.

522

523         *RNA isolation.* Total RNA from each of 3 axotomized chambers and 3 sham  
524 manipulated chambers (6 total samples) was isolated from the somatodendritic  
525 compartment of 14 DIV cultures, 24 h after manipulation. RNA was collected from the  
526 entire somatodendritic compartment for our gene expression analysis; thus, a fraction of  
527 neurons in the axotomized chambers were axotomized and the remaining fraction  
528 uninjured or “uncut”. RNA was isolated using an RNAqueous-Micro Kit (Ambion)  
529 according to the manufactures instructions including DNase treatment, with  
530 modifications specific to accessing the microfluidic compartment <sup>16</sup>. Briefly, 50 µl lysis  
531 solution was added to one somatodendritic well and collected from the other  
532 somatodendritic well after solution flowed through the somatodendritic compartment to  
533 this adjacent well. Lysate was added to 50 µl of fresh lysis solution and mixed well by  
534 careful pipetting. Further RNA purification steps were performed according to  
535 the manufacturer's guidelines. Samples were maintained at -80°C until prepared for  
536 microarray gene expression.

537

538         *Microarray analysis.* Quantification of RNA integrity and concentration was  
539 confirmed with an Agilent TapeStation 2200 at the UNC Lineberger Comprehensive  
540 Cancer Center Genomics Core. Microarrays were processed at the UNC School of  
541 Medicine Functional Genomics Core using the Affymetrix GeneChip WT Plus Reagent  
542 Kit for cRNA amplification, cDNA synthesis, fragmenting and labeling. Samples were



543 hybridized to Rat Gene 2.0 ST Arrays (Affymetrix). Data analysis was performed with  
544 Affymetrix Expression Console software and Affymetrix Transcriptome Analysis  
545 Console v2.0 software to compare axotomized cultures to uninjured control samples  
546 using one-way between-subject ANOVA of RMA normalized intensities. Quality control  
547 data is presented in **Supplementary Fig. 5**. Because a fraction of the harvested cells were  
548 uninjured in our axotomized samples, we used modest fold change values for defining  
549 our list of significantly changed transcripts (fold change absolute value  $\geq 1.1$  and  
550 ANOVA p-value  $< 0.05$ ). To identify cell-cell adhesion transcripts we searched for the  
551 biological process gene ontology category 'cell-cell adhesion'. Fold change shown in  
552 **Fig. 7** was calculated by dividing the mean  $\log_2$  intensity value of the uninjured control  
553 by the mean  $\log_2$  intensity value of the axotomized culture samples.

554         Raw microarray data of cortical layers V/VI of female Wistar rats subjected to  
555 either spinal cord transections at thoracic layer 8 or sham injury 1 day and 7 days  
556 following injury was downloaded from EMBL-EBI Array Express (E-MTAB-794)<sup>37</sup>.  
557 Four animals were used for each condition and samples were hybridized to Rat Gene 1.0  
558 ST Arrays (Affymetrix). The microarray data was previously validated using qPCR. Data  
559 analysis was performed with Affymetrix Expression Console software and Affymetrix  
560 Transcriptome Analysis Console v2.0 software to compare cortical layers V/VI from  
561 lesioned to sham operated animals.

562

563         *Image acquisition and dendritic spine analysis.* High-resolution z-stack montages  
564 of mCherry or eGFP labeled live neurons were captured using either a Zeiss LSM 780  
565 (63x 1.4 NA or 40x 1.4 NA oil immersion objective) or an Olympus IX81 microscope

566 (60x 1.3 NA silicon oil immersion objective). For live imaging, we captured “0 h” or  
567 “before axotomy” confocal z-stack images to create montages of neurons extending  
568 axons into the axonal compartment. Axotomy was performed on the same day after  
569 acquiring these images. Images were acquired from the same neuron 24 h post-axotomy.  
570 In some cases, images were also acquired from the same neurons at 48 h post-axotomy  
571 (**Fig. 1, 2 and 8**). Calibrated z-stack montages were analyzed for all dendrite and spine  
572 parameters. Primary dendrites were traced using the semiautomatic neurite tracing tool,  
573 Neuron J<sup>56, 57</sup>. The number of spines on all primary dendrites of each neuron were  
574 manually labeled and categorized as thin, stubby or mushroom shaped using Neuron  
575 Studio<sup>58</sup>. Spine density was calculated for 10  $\mu\text{m}$  length of dendrite as [(# of spines /  
576 dendrite length)\*10]. Blinded data analysis was performed.

577

578

579 *FM dye experiments and analysis.* Cultures in microfluidic chambers at 24 h (14  
580 DIV), 48 h (15 DIV), and 4d (17 DIV) post-axotomy were loaded with lipophilic dye FM  
581 5-95 (Invitrogen) using KCl mediated depolarization as described previously<sup>24</sup>. Briefly,  
582 cultures were first incubated for 30 min with pre-warmed HEPES-buffered solution  
583 (HBS; 119 mM NaCl, 5 mM KCl, 2 mM CaCl<sub>2</sub>, 2 mM MgCl<sub>2</sub>, 30 mM glucose, 10  
584 mM HEPES). Media was then replaced with FM dye loading solution containing  
585 10  $\mu\text{M}$  FM 5-95, 20  $\mu\text{M}$  AMPAR antagonist 6-cyano-7-nitroquinoxaline-2,3-dione  
586 disodium (CNQX; Tocris), 50  $\mu\text{M}$  NMDAR antagonist D-(-)-2-amino-5-  
587 phosphonopentanoic acid (D-AP5; Tocris) in 90 mM KCl HBS for 1 min. The loading  
588 solution was replaced with HBS containing 10  $\mu\text{M}$  FM 5-95 for 1 min and later rinsed

589 three times with a high-Mg<sup>2+</sup>, low-Ca<sup>2+</sup> solution (106 mM NaCl, 5 mM KCl, 0.5  
590 mM CaCl<sub>2</sub>, 10 mM MgCl<sub>2</sub>, 30 mM glucose, 10 mM HEPES) containing 1 mM Advasep-  
591 7 (Biotium) to remove extracellular membrane-bound FM. Finally, cultures were washed  
592 in HBS containing 20 μM CNQX and 50 μM D-AP5 for at least three times, 1 min each.  
593 Next, we stimulated the microfluidic chambers using extracellular electrodes by placing a  
594 positive and negative electrode in each well of the somatodendritic compartment.

595 Electrical stimulation was provided by an AD Instrument 2 Channel Stimulus  
596 Generator (STG4002) in current mode with an asymmetric waveform (-480 μA for 1 ms  
597 and +1600 μA for 0.3 ms) for ~ 1 min at 20 hz for 600 pulses. The FM 5-95 imaging was  
598 performed as described previously using a spinning disk confocal imaging system<sup>24</sup>. Z-  
599 stacks (31 slices) were captured every 15 s during the baseline (1 min), stimulation (1  
600 min), and after stimulation (2 min) periods. This stimulation pattern was optimized for  
601 efficient FM unloading within these microfluidic chambers and the frequency is greater  
602 than typically used in open well dishes. At least 3 baseline images were acquired before  
603 electrical stimulation.

604 Blinded data analysis was performed. Sum projected confocal z-stack were  
605 converted to 8-bit images and registered using TurboReg, an Image J plugin. We  
606 background subtracted the image stack using the image 3 min after stimulation began.  
607 Image stacks were thresholded to a pixel value of 15. FM puncta between 0.4 to 10 μm<sup>2</sup>  
608 were analyzed. We measured the intensity of each punctum in the whole field or  
609 specifically on eGFP labeled neurons (**Fig. 3a-c**) throughout all time-series. To analyze  
610 the unloading kinetics of FM puncta on eGFP labeled neurons, we first thresholded the  
611 eGFP image and then created an outline enclosing all the eGFP labeled regions including

612 spines. The outlined ROI was superimposed on the FM labeled image and the intensity of  
613 each punctum in the selected ROI (eGFP outline) was measured throughout all time  
614 series. We normalized fluorescence intensity of each puncta to the frame before  
615 stimulation. Puncta with >5% unloading after 1 min were used in the analysis as  
616 unloaded puncta. Time constants were estimated by curve fitting unloading kinetics to a  
617 single exponential decay function<sup>24</sup>. Curve fitting was done in MATLAB and FM puncta  
618 with time constants longer than 3 min were excluded from the analysis and assumed to be  
619 non-releasing. Number of FM puncta that unload >5% after 60s were classified as  
620 responsive using image stacks that were not background subtracted; puncta that did not  
621 meet this criteria were classified as unresponsive.

622 In activity and transcription blocking experiments, the FM 5-95 unloading  
623 experiment was performed as mentioned above at 48 h post-axotomy. The intensity  
624 measurements of each punctum in the whole field and subsequent analysis of FM  
625 unloading kinetics was performed as mentioned above.

626 To determine the fraction of vGLUT1 or GAD67-positive FM puncta, the somal  
627 compartment of 15DIV cultures were loaded with FM 4-64FX (10  $\mu$ M; Invitrogen),  
628 fixable analog of FM 4-64 membrane stain, using KCl mediated depolarization as  
629 described above. Following subsequent strip and wash steps, cells were fixed with 4%  
630 PFA in PBS and immunostained with anti-GAD67 and anti-vGLUT1 antibodies. Total  
631 number of vGLUT1, GAD67, and FM puncta were acquired by processing confocal Z-  
632 stack images using 3D foci picker, an ImageJ plugin<sup>59</sup>.

633

634

635           *Drug treatments.* Local activity blockade solution (ABS), which includes low-  
636  $\text{Ca}^{2+}$ , high- $\text{Mg}^{2+}$ , and TTX (0.5 mM  $\text{CaCl}_2$ , 10 mM  $\text{MgCl}_2$ , 1  $\mu\text{M}$  TTX) was applied solely  
637 to the axonal compartment for 1 h during axotomy (15 min prior and 45 min after  
638 axotomy). 5,6-dichloro-1- $\beta$ -D-ribofuranosyl-1H-benzimidazole (DRB; Sigma-Aldrich #  
639 D1916) was suspended in DMSO and applied to the somatodendritic compartment at a  
640 final concentration of 80  $\mu\text{M}$  for 1 h during axotomy (beginning 15 min prior to  
641 axotomy). Tetrodotoxin citrate (TTX; Tocris Bioscience # 1078) was suspended in HBS  
642 and applied to the somatodendritic compartment at a final concentration of 1  $\mu\text{M}$  for 1 h  
643 during axotomy (beginning 15 min prior to axotomy). Media stored from the axonal  
644 compartment prior to treatment was added back to the axonal compartment after  
645 treatment. Exogenous netrin-1 was applied to the somatodendritic compartment 1  $1/2$  days  
646 after axotomy, when spine changes were observed, at a final concentration of 625 ng/ml.  
647 A similar netrin-1 concentration has been used for cortical neurons over a treatment time  
648 of 1-2 days to examine netrin-specific responses<sup>60</sup>. Netrin-1 was applied for 8-10 h to  
649 observe stable synaptic changes. For DCC function blocking experiments, anti-DCC  
650 (mDCC; Calbiochem # OP45) and isotype control (mIgG; BD pharmingen #554121) was  
651 applied to the somatodendritic compartment of uninjured chambers at a final  
652 concentration of 1  $\mu\text{g}/\text{ml}$  for 24 h.

653

654           *Microscopy.* FM and fixed imaging was performed using CSU-X1 (Yokogawa)  
655 spinning disk confocal imaging unit configured for an Olympus IX81 microscope (Andor  
656 Revolution XD). Live imaging of neurons for spine analysis was captured using a Zeiss  
657 LSM 780 confocal microscope with a Plan-Apochromat 40x objective (NA 1.4) at the

658 UNC Neuroscience microscopy core facility. Excitation for the spinning disk confocal  
659 imaging system was provided by 405 nm, 488 nm, 561 nm, and/or 640 nm lasers. The  
660 following bandpass emission filters (BrightLine, Semrock) were used: 447/60 nm  
661 (TRF447-060), 525/30 nm (TRF525-030), 607/36 nm (TR-F607-036), 685/40 nm (TR-  
662 F685-040). For FM imaging, the spinning disk confocal imaging system was used with  
663 excitation at 561 nm and the 685/40 nm emission filter. We used 2x2 binning to reduce  
664 the laser intensity and acquisition time for each frame; each z-stack was obtained in ~5 s.  
665 For the Zeiss LSM 780, signal was acquired from eGFP (493 nm - 558 nm), Alexa 568  
666 (569 nm - 630 nm), and Alexa 647 (640 nm - 746 nm).

667

668 *Whole-Cell Electrophysiology.* For whole-cell recordings, neurons were visually  
669 identified with infrared differential interference contrast optics. Cells were recorded in  
670 voltage-clamp configuration with a patch clamp amplifier (Multiclamp 700A), and data  
671 were acquired and analyzed using pCLAMP 10 software (Molecular Devices). Patch  
672 pipettes were pulled from thick-walled borosilicate glass with open tip resistances of 2–7  
673 M $\Omega$ . Series and input resistances were monitored throughout the experiments by  
674 measuring the response to a  $-5$ -mV step at the beginning of each sweep. Series  
675 resistance was calculated using the capacitive transient at the onset of the step and input  
676 resistance was calculated from the steady-state current during the step. Recordings were  
677 sampled at 10 kHz and bessel filtered at 2 kHz. No series resistance compensation was  
678 applied.

679 Prior to recording, microfluidic chambers and PDMS molds were removed and  
680 the glass coverslips containing cells were mounted onto a submersion chamber,

681 maintained at 32° C. Cultures were perfused at 2 mL/min with artificial cerebrospinal  
682 fluid (ACSF) containing 124 mM NaCl, 3 mM KCl, 1.25 mM Na<sub>2</sub>PO<sub>4</sub>, 26 mM NaHCO<sub>3</sub>,  
683 1 mM MgCl<sub>2</sub>, 2 mM CaCl<sub>2</sub> and 20 mM d-(+)-glucose, saturated with 95% O<sub>2</sub>, 5% CO<sub>2</sub>.  
684 To determine if recorded neurons' axons entered the microfluidic chamber, 0.035 mM  
685 Alexa-594 was included in all internal solutions to allow for post-hoc visualization of  
686 neuronal morphology.

687 Events with a rapid rise time and exponential decay were identified as mEPSCs or  
688 mIPSCs respectively using an automatic detection template in pCLAMP 10, based on  
689 previously published methods<sup>61</sup>. mEPSC events were post-hoc filtered to only include  
690 events with a peak amplitude  $\geq 5$  pA and a  $\leq 3$  ms 10-90% rise time. Mean mEPSC  
691 parameters were quantified from a 10 min recording period and mIPSC parameters were  
692 sampled from a 5 min recording period. Neurons were excluded from analysis if  $R_{series}$   
693 was  $>25$  M $\Omega$  anytime during the recording.

694  
695 *mEPSCs Recordings.* mEPSC recordings were performed similar to previously  
696 described<sup>62</sup>. AMPAR-mediated mEPSCs were isolated by voltage-clamping neurons at -  
697 70 mV and by supplementing the ACSF with TTX citrate (1  $\mu$ M, Abcam), the GABA (A)  
698 receptor antagonist picrotoxin (50  $\mu$ M, Sigma-aldrich), and the NMDA receptor  
699 antagonist D, L-2-amino-5 phosphonopentanoic acid (100  $\mu$ M, AP5, Abcam). The  
700 internal solution contained: 100 mM CsCH<sub>3</sub>SO<sub>3</sub>, 15 mM CsCl, 2.5 mM MgCl<sub>2</sub>, 5 mM  
701 QX-314-Cl, 5 mM tetra-Cs-BAPTA, 10 mM HEPES, 4 mM Mg-ATP, 0.3 mM Na-GTP,  
702 and 0.5% (w/v) neurobiotin with pH adjusted to 7.25 with 1 M CsOH and osmolarity  
703 adjusted to  $\sim 295$  mOsm with sucrose.

704

705 *mIPSC recordings.* mIPSCs were isolated by supplementing the ACSF with TTX  
706 citrate (1  $\mu$ M), the NMDA receptor antagonist AP5 (100  $\mu$ M), and the AMPA/Kainate  
707 receptor antagonist 6,7-dinitroquinoxaline-2,3-dione (20  $\mu$ M, DNQX, dissolved in  
708 DMSO for a final concentration of 1% v/v DMSO in ACSF, Abcam). For mIPSC  
709 recordings, the pipette solution contained a relatively lower chloride concentration,  
710 similar to intracellular chloride concentrations that are present in more mature neurons<sup>63</sup>.  
711 This pipette solution contained, 110 mM CsCH<sub>3</sub>SO<sub>3</sub>, 2.5 mM MgCl<sub>2</sub>, 5 mM QX-314-Cl,  
712 5 mM tetra-Cs-BAPTA, 10 mM HEPES, 4 mM Mg-ATP, 0.3 mM Na-GTP, and 0.5%  
713 (w/v) neurobiotin with pH adjusted to 7.28 with 1 M CsOH and a 300 mOsm osmolarity.  
714 Following break-in, neurons were first voltage-clamped at -70 mV for at least three  
715 minutes to allow dialysis with pipette solution, after which the voltage was gradually  
716 changed to 0 mV, where it was maintained for duration of the recording.

717

718 *SCI injury and in vivo electrophysiology.* Nineteen adult male, Fischer-344 inbred  
719 rats (Harlan Laboratories, Indianapolis, IN) were selected for this study. A total of 14 rats  
720 received a contusion injury in the thoracic cord at level T9–T10, whereas 5 rats were  
721 randomly selected as uninjured controls. After a minimum of 4 weeks following SCI,  
722 intracortical microstimulation (ICMS) and single-unit recording techniques were used in  
723 the hindlimb motor area (HLA) to determine movements evoked by ICMS and spike  
724 rates. The protocol was approved by the University of Kansas Medical Center  
725 Institutional Animal Care and Use Committee.



726 Spinal cord surgeries were performed under ketamine hydrochloride (80  
727 mg/kg)/xylazine (7 mg/kg) anesthesia and aseptic conditions. Each of the SCI rats  
728 underwent a T9–T10 laminectomy and contusion injury using an Infinite Horizon spinal  
729 cord impactor (Precision Systems and Instrumentation, LLC, Fairfax Station, VA) with a  
730 200 Kdyn impact. At the conclusion of surgery, 0.25% bupivacaine hydrochloride was  
731 applied locally to the incision site. Buprenex (0.01mg/kg, SC) was injected immediately  
732 after surgery and 1 day later. On the first week after surgery, the rats received daily  
733 injections of 30,000U penicillin in 5mL saline. Bladders were expressed twice daily until  
734 the animals recovered urinary reflexes.

735 Post-SCI surgical and neurophysiological procedures were conducted under  
736 aseptic conditions 4 to 18 weeks post-SCI. At the time of these procedures, ages ranged  
737 from 4.5 to 7.5 months. After an initial, stable anesthetic state was reached using  
738 isoflurane anesthesia, isoflurane was withdrawn and the first dose of ketamine  
739 hydrochloride (100 mg/kg)/xylazine (5 mg/kg) was administered. The rats were placed in  
740 a Kopf small-animal stereotaxic instrument and a craniectomy was performed over the  
741 motor cortex. The dura was incised and the opening filled with warm, medical grade,  
742 sterile silicone oil. Core temperature was maintained within normal physiological limits  
743 using a feedback-controlled heating pad during the entire procedure. A stable anesthetic  
744 level was assessed by monitoring the respiratory and heart rate, and reflexes to noxious  
745 stimuli.

746 In each rat, neuronal recordings were begun at ~3 h after initiation of the  
747 procedure. Neuronal action potentials (single-units or spikes) were recorded with a  
748 single-shank, 16-channel Michigan-style linear microelectrode probe (Neuronexus, Ann

749 Arbor, MI). A total of 15 channels were active in each procedure. The tip of the probe  
750 was lowered to a depth of 1720  $\mu\text{m}$  below the cortical surface, allowing accurate  
751 determination of depth for each recording site. Because no hindlimb responses were  
752 evoked using ICMS in SCI rats, the location of HLA in SCI rats was determined by the  
753 stereotaxic coordinates derived in normal rats in a previous study (centered at 2 mm  
754 posterior and 2.64 mm lateral to bregma). At each cortical location, electrical activity was  
755 collected and digitized for 5 min from each of the 15 active sites using  
756 neurophysiological recording and analysis equipment (Tucker Davis Technologies,  
757 Alachua, FL). Neural spikes were discriminated using principle component analysis.  
758 Sample waveforms (1.3 msec in duration) were collected that passed 5.5 X SD below  
759 root mean square (RMS). After each experiment, the probe was cleaned with Opti-Free  
760 solution (Alcon Laboratories, Fort Worth, TX), followed by ethanol and then rinsed  
761 thoroughly in distilled water. The electrode impedance of each site remained at  $0.9\text{M}\Omega$   
762 for each experiment. At the end of the recording session, rats were humanely euthanized  
763 with an overdose of sodium pentobarbital. Rats were randomized to SCI and control  
764 groups. It was not possible to blind the surgeon performing the craniectomy and  
765 neurophysiological data collection to group assignment, but these data were collected  
766 using an automated system. The data analyst performing the post-hoc spike  
767 discrimination procedures for each animal's neurophysiological data was blind to group  
768 assignment.

769

770 *Statistics.* Statistics were analyzed using Graphpad Prism 6. For spine density  
771 measurements, we used paired two-tailed t-tests. Sample sizes were determined by power

772 analysis, setting a desired Cohen's  $d$  statistical power to 0.8 and using a 5% error rate  
773 (type I). For the paired spine density analyses (Fig. 1d, 6b-c, 8b, 8i), we calculated a  
774 minimum sample size of 10 primary dendritic processes per condition using means and  
775 standard deviations from Fig. 1d. For FM unloading analyses (Fig. 3c, 3i, 6e, 6g, suppl.  
776 3b-f), we used a minimum sample size of 50 FM puncta per condition based on  
777 previously published data<sup>24</sup> and using means and standard deviations from Fig. 3c. For  
778 unresponsive/responsive FM puncta analyses (Fig. 3d-e, 6d, 6f, 8c-d), we calculated a  
779 minimum sample size of 6 frames per condition using means and standard deviations of  
780 unresponsive puncta in uninjured control versus 48h post-axotomy (Fig. 3e). For  
781 vGAT/vGLUT1 puncta per area analyses (Fig. 5c, 8e-f, 8j), we calculated a minimum  
782 sample size of 8 neuron fields per condition using the means and standard deviations of  
783 vGAT puncta per area in control and axotomized samples (Fig. 5c). For the fraction of  
784 GAD67 or vGLUT1 puncta to FM puncta analyses (Fig. 5a,b), we calculated a minimum  
785 sample size of 18 frames per condition using the means and standard deviations found in  
786 Fig. 5b. For DCC immunofluorescence per spine analyses (Fig. 8h), we calculated a  
787 minimum of 75 samples per condition using the means and standard deviations of  
788 controls and axotomized samples. We estimated requisite samples size for recordings of  
789 spontaneous postsynaptic currents by assuming a doubling or halving of mEPSC or  
790 mIPSC parameters following axotomy in correlation with the magnitude of changes  
791 observed in our analysis of spine numbers, presynaptic release data, and based on similar  
792 effect sizes being reported following synaptic activity blockade<sup>64, 65</sup>. Standard deviation  
793 values for the power analysis were estimated based on previously published values from  
794 dissociated hippocampal neuron electrophysiological recordings (Henry et al, 2012 and

795 Hartman et al, 2006). This analysis suggested we required 13 samples per group for  
796 mEPSCs and 9 samples per group for mIPSCs. All recording, (Figures 3g-h, 5d-f) meet  
797 or exceed the sample size required by our power analysis. For *in vivo* experiments,  
798 hypotheses regarding spike firing rates were tested independently in each cortical layer  
799 (Va, Vb and VI) using a two-tailed t-test, ( $\alpha = 0.05$ ). Samples were not excluded  
800 from our data sets and sample size was determined based on our experience and previous  
801 publications<sup>24</sup>. As confirmation of sufficient sample sizes, we used the means and  
802 standard deviations for layer Vb control and SCI conditions and calculated a minimum of  
803 112 samples for control and 282 samples for SCI conditions. For all experiments, sample  
804 sizes were equal or greater than the calculated minimum sample sizes.

805

806 *Data availability.* The microarray data has been submitted to GEO (accession  
807 number GSE89407). All relevant data will be available from authors upon request.

808

809 REFERENCES:

- 810 1. Nudo, R.J. *Front Hum Neurosci* **7**, 887 (2013).
- 811 2. Takechi, U., *et al. Clin Neurophysiol* **125**, 2055-2069 (2014).
- 812 3. Nudo, R.J. & Milliken, G.W. *J Neurophysiol* **75**, 2144-2149 (1996).
- 813 4. Oudega, M. & Perez, M.A. *J Physiol* **590**, 3647-3663 (2012).
- 814 5. Frost, S.B., *et al. J Neurophysiol* **89**, 3205-3214 (2003).
- 815 6. Rishal, I. & Fainzilber, M. *Nat Rev Neurosci* **15**, 32-42 (2014).
- 816 7. Urban, E.T., 3rd, *et al. Molecular and cellular biochemistry* **369**, 267-286 (2012).
- 817 8. Kim, B.G., *et al. Exp Neurol* **198**, 401-415 (2006).
- 818 9. Jacobs, K.M. & Donoghue, J.P. *Science* **251**, 944-947 (1991).
- 819 10. Ding, M.C., *et al. J Neurosci* **31**, 14085-14094 (2011).
- 820 11. Taylor, A.M., *et al. Nat Methods* **2**, 599-605 (2005).
- 821 12. Taylor, A.M., *et al. Neuron* **66**, 57-68 (2010).
- 822 13. Neto, E., *et al. The Journal of Neuroscience* **36**, 11573-11584 (2016).
- 823 14. Nakatomi, H., *et al. Cell* **110**, 429-441 (2002).
- 824 15. Will, B., *et al. Progress in Neurobiology* **72**, 167-182 (2004).
- 825 16. Taylor, A.M., *et al. J Neurosci* **29**, 4697-4707 (2009).

- 826 17. Banker, G.A. & Cowan, W.M. *Brain Res* **126**, 397-342 (1977).
- 827 18. Benson, D.L., *et al.* *J Neurocytol* **23**, 279-295 (1994).
- 828 19. Greer, J.E., *et al.* *J Neurosci* **32**, 6682-6687 (2012).
- 829 20. Ikeda, S. & Nakagawa, S. *Brain Res* **792**, 164-167 (1998).
- 830 21. McIlwain, D.L. & Hoke, V.B. *BMC Neurosci* **6**, 19 (2005).
- 831 22. Ghosh, A., *et al.* *Cereb Cortex* **22**, 1309-1317 (2012).
- 832 23. Gao, X., *et al.* *PLoS One* **6**, e24566 (2011).
- 833 24. Taylor, A.M., *et al.* *J Neurosci* **33**, 5584-5589 (2013).
- 834 25. Zakharenko, S.S., *et al.* *Nat Neurosci* **4**, 711-717 (2001).
- 835 26. Frost, S.B., *et al.* *J Neurotrauma* **32**, 1666-1673 (2015).
- 836 27. Lewicki, M.S. *Network* **9**, R53-78 (1998).
- 837 28. Nudo, R.J., *et al.* *The Journal of Comparative Neurology* **358**, 181-205 (1995).
- 838 29. Barron, K.D., *et al.* *J Neuropathol Exp Neurol* **47**, 62-74 (1988).
- 839 30. Chen, J.L., *et al.* *Neuron* **74**, 361-373 (2012).
- 840 31. Markram, H., *et al.* *Nat Rev Neurosci* **5**, 793-807 (2004).
- 841 32. Chiu, C.Q., *et al.* *Science* **340**, 759-762 (2013).
- 842 33. Higley, M.J. *Nat Rev Neurosci* **15**, 567-572 (2014).

- 843 34. Manitt, C., *et al.* *J Neurosci Res* **84**, 1808-1820 (2006).
- 844 35. Horn, K.E., *et al.* *Cell Rep* **3**, 173-185 (2013).
- 845 36. Goldman, J.S., *et al.* *J Neurosci* **33**, 17278-17289 (2013).
- 846 37. Jaerve, A., *et al.* *PLoS One* **7**, e49812 (2012).
- 847 38. Xu, K., *et al.* *Science* **344**, 1275-1279 (2014).
- 848 39. Manitt, C., *et al.* *J Neurosci* **29**, 11065-11077 (2009).
- 849 40. Canty, A.J., *et al.* *J Neurosci* **33**, 10374-10383 (2013).
- 850 41. Persson, A.K., *et al.* *J Neurosci* **33**, 19250-19261 (2013).
- 851 42. Cho, Y., *et al.* *Cell* **155**, 894-908 (2013).
- 852 43. Wong, Y.C. & Holzbaaur, E.L. *J Neurosci* **34**, 1293-1305 (2014).
- 853 44. Branco, T., *et al.* *Neuron* **59**, 475-485 (2008).
- 854 45. Gonzalez-Forero, D. & Moreno-Lopez, B. *Neuroscience* **283**, 138-165 (2014).
- 855 46. Sunico, C.R., *et al.* *J Neurosci* **25**, 1448-1458 (2005).
- 856 47. Stavoe, A.K. & Colon-Ramos, D.A. *The Journal of Cell Biology* **197**, 75-88  
857 (2012).
- 858 48. Colon-Ramos, D.A., *et al.* *Science* **318**, 103-106 (2007).
- 859 49. Ahn, K.J., *et al.* *Neurosci Lett* **419**, 43-48 (2007).

- 860 50. Lu, H., *et al.* *Front Med* **5**, 86-93 (2011).
- 861 51. Han, X., *et al.* *Mol Neurobiol* (2016).
- 862 52. Sun, H., *et al.* *Neurobiol Dis* **44**, 73-83 (2011).
- 863 53. Tu, H., *et al.* *Neuron* **86**, 1407-1419 (2015).
- 864 54. McKinley, P.A. & Smith, J.L. *J Neurosci* **10**, 1429-1443 (1990).
- 865 55. Wickersham, I.R., *et al.* *Neuron* **53**, 639-647 (2007).
- 866 56. Fu, M.M. & Holzbaur, E.L. *Autophagy* **10**, 2079-2081 (2014).
- 867 57. Nagendran, T. & Hardy, L.R. *Neuroscience* **199**, 548-562 (2011).
- 868 58. Rodriguez, A., *et al.* *PLoS One* **3**, e1997 (2008).
- 869 59. Du, G., *et al.* *Radiat Res* **176**, 706-715 (2011).
- 870 60. Menon, S., *et al.* *Dev Cell* **35**, 698-712 (2015).
- 871 61. Clements, J.D. & Bekkers, J.M. *Biophys J* **73**, 220-229 (1997).
- 872 62. Larsen, R.S., *et al.* *Neuron* **83**, 879-893 (2014).
- 873 63. Yamada, J., *et al.* *J Physiol* **557**, 829-841 (2004).
- 874 64. Hartman, K.N., *et al.* *Nat Neurosci* **9**, 642-649 (2006).
- 875 65. Henry, F.E., *et al.* *J Neurosci* **32**, 17128-17142 (2012).

876



877

878 **Acknowledgements:** We thank Stephanie Gupton for netrin-1, Kelly Carstens for  
879 preliminary gene expression work, Cassie Meeker for technical support, and Fabio  
880 Urbina for assistance in statistical analysis. We thank Richard Segal (MUSC), Julius  
881 Dewald (RIC) and Taylor lab members for their advice and discussions. **Funding:**  
882 A.M.T. acknowledges support from the Eunice Kennedy Shriver NICHD (K12  
883 HD073945), NIMH (R42 MH097377), and an Alfred P. Sloan Research Fellowship.  
884 Imaging was supported by the Confocal and Multiphoton Imaging Core Facility of  
885 NINDS Center Grant P30 NS045892 and NICHD Center Grant (U54 HD079124). R.S.L.  
886 was supported by NRSA predoctoral fellowship F31 MH091817 and the UNC  
887 Department of Cell Biology and Physiology's Dr. Susan Fellner fellowship. R.L.B. was  
888 supported in part by a grant from the National Institute of General Medical Sciences  
889 under award 5T32 GM007092. **Author contributions:** T.N. designed and performed  
890 experiments and wrote the manuscript. R.S.L. designed and performed electrophysiology  
891 experiments. R.L.B. designed and performed experiments.. S.B.F. performed  
892 experiments. B.D.P. designed experiments. R.J.N. designed and performed experiments.  
893 A.M.T. designed experiments and wrote the manuscript. **Competing financial interests:**  
894 Yes there is potential competing interest. A.M.T. is an inventor of the microfluidic  
895 chambers (US 7419822 B2) and has financial interest in Xona Microfluidics, LLC. T.N.,  
896 R.L.B., R.S.L., R.J.N. and B.D.P. declare no competing financial interests.

897

898 **Fig. 1: Distal axotomy of pyramidal neurons within microfluidic chambers induced**  
899 **dendritic spine loss on axotomized neurons. (a)** 14 DIV rat hippocampal neurons  
900 cultured within a microfluidic chamber. Pyramidal neurons were retrogradely labeled  
901 using a G-deleted mCherry rabies virus added exclusively to the axonal compartment. **(b)**  
902 Cartoon illustration of *in vitro* axotomy (Axot.) within microfluidic chambers to  
903 selectively axotomize a subset of labeled neurons (red) that extend axons through the  
904 microgroove region. Axons of uninjured neurons (grey) extend axons within the  
905 somatodendritic compartment. **(c)** Representative images of mCherry-labeled neurons  
906 and dendritic segments (inverted fluorescence) from repeated live imaging of uninjured  
907 control (Uninj. cntl) and axotomized neurons. Axotomized neurons were imaged before  
908 axotomy on DIV 13 (before) and uninjured controls were also imaged on DIV 13 (0 h);  
909 both conditions were imaged at 14 DIV (24 h after). Image and inset scale bars, 50 and 5  
910  $\mu\text{m}$ , respectively. **(d)** Quantification of spine density illustrated in (c). *Uninj. cntl*: n=20  
911 dendrites; 5 neurons; 3 chambers over 3 experiments; #spines/TDL: 315/2698 $\mu\text{m}$  (0h),  
912 388/2737 $\mu\text{m}$  (24h after). *Axot.*: n=26 dendrites; 5 neurons; #spines/TDL: 405/3569 $\mu\text{m}$   
913 (before), 274/2998 $\mu\text{m}$  (24h after), 229/2821 $\mu\text{m}$  (48h after). 3 chambers over 3  
914 experiments. Paired two-tailed t-test. \*\*p<0.01, \*\*\*\*p<0.0001. Error bars, s.e.m.

915  
916 **Fig. 2: Axotomy causes dendritic spine loss and reduces new spine formation. (a)**  
917 Quantification of stubby, mushroom, and thin spine densities before axotomy, 24h post-  
918 axotomy, 48h post-axotomy, and in uninjured controls. Uninjured controls and  
919 axotomized samples were imaged beginning at 13 DIV (labeled “0 h” or “Before”,  
920 respectively). *Uninj. cntl*: n=20 dendrites; 5 neurons; 3 chambers over 3 experiments;

921 #spines/TDL: 315/2698 $\mu$ m (0h), 388/2737 $\mu$ m (24h after). *Axot.*: n=26 dendrites; 5  
922 neurons; #spines/TDL: 405/3569 $\mu$ m (before), 274/2998 $\mu$ m (24h after), 229/2821 $\mu$ m (48h  
923 after). 3 chambers over 3 experiments. Repeated-measure two-way ANOVA, Bonferroni  
924 post-hoc test. **(b)** Representative images of dendritic segments from uninjured control and  
925 axotomized neurons at 0 h or before axotomy, respectively, and 24 h after. Astericks  
926 indicate spines eliminated; arrows indicate formation of new spines. Scale bars, 5  $\mu$ m.  
927 **(c-d)** Bar graphs represent percentage of spines eliminated (*c*) and newly formed (*d*) after  
928 24h in controls and 24h post-axotomy. *Uninj. cntl.*: n=28 dendrites; 6 neurons; #spines  
929 eliminated: 92; #spines formed: 177; TDL(0h, 24h after): 3147, 3148 $\mu$ m. *Axot.*: n=35  
930 dendrites; 6 neurons; #spines eliminated: 208; #spines formed: 75; TDL (before, 24h  
931 after): 4290, 3865 $\mu$ m. 3 chambers over 3 experiments. Unpaired two-tailed t-test.  
932 \*\*p<0.01, \*\*\*\*p<0.0001. Error bars, s.e.m.

933

934 **Fig. 3: Distal axotomy induces a delayed trans-synaptic increase in presynaptic-**  
935 **excitability onto axotomized neurons. (a)** A representative neuron retrogradely labeled  
936 with a modified eGFP rabies virus via the axonal compartment. Enlarged region shows  
937 FM puncta colocalized with eGFP dendrites and spines (arrows). ImageJ 'fire' color  
938 look-up-table shown in (*b*). Scale bar, 20  $\mu$ m. **(b)** Representative images show FM puncta  
939 colocalized with eGFP dendrites (outlined in white dashed lines) before and after field  
940 stimulation in uninjured control, and 24h and 48h post-axotomy. Arrows highlight  
941 destaining at spines. Scale bars, 10  $\mu$ m. **(c)** FM unloading of colocalized puncta 24h post-  
942 axotomy (control, n=185 puncta; axotomy, n=256 puncta) and 48h post-axotomy  
943 (control, n=232 puncta; axotomy, n=322 puncta). Two-way ANOVA, Bonferroni post-

944 hoc test. Inset shows FM decay time constant ( $\tau$ ) for puncta with  $\tau < 360$ sec (24h control,  
945 n=151; 24h axotomy, n=201; 48h control, n=211; 48h axotomy, n=304). (b-c) Unpaired  
946 two-tailed t-test. Each condition includes 5-6 chambers/neurons over 3 experiments.  
947 (d) Percent responsive and unresponsive FM puncta per neuron field (n=8  
948 fields/chambers; 4 experiments). Unpaired two-tailed t-test, axotomy versus control for  
949 each timepoint. (e) Number of responsive and unresponsive FM puncta per frame at 48h  
950 post-axotomy (n=11 chambers; 5 experiments). Unpaired two-tailed t-test, unresponsive  
951 puncta. (f) Representative mEPSC traces 48h post-axotomy. (g) mEPSC frequency and  
952 amplitude at 48h post-axotomy (control, n=17 neurons; axotomy, n=20 neurons; 4  
953 experiments). Inset: Cartoon depicts recordings from either uninjured control neurons  
954 (black) or directly injured neurons (red). (h) Analysis of mEPSC frequency and  
955 amplitude of cut neurons [cut (red), n=10 neurons] compared to neighboring uncut  
956 neurons within axotomized chambers [uncut (grey), n=10 neurons]. (g-h) Unpaired two-  
957 tailed t-test, Welch's correction. (i) FM unloading of neighboring uncut neurons  
958 identified by lack of eGFP (uncut neighbors, n=816 puncta), uninjured control neurons  
959 (uncut-labeled, n=232), and axotomized labeled neurons (cut-labeled, n=322). Two-way  
960 ANOVA, Bonferroni post-hoc test; Each condition, 5 chambers and 3 experiments.  
961 Decay time constant ( $\tau$ ) of FM puncta at 48h post-axotomy (uncut-labeled, n=211; cut-  
962 labeled, n=304; uncut neighbors unlabeled, n=703). One-way ANOVA, Bonferroni post-  
963 hoc test. \*  $p < 0.05$ , \*\*\*  $p < 0.001$ . Error bars, s.e.m.

964

965 **Fig. 4: Spinal cord injury increases spontaneous single-unit firing rate in layer Vb of**  
966 **hindlimb cortex 4-18 weeks following injury.**

967 Mean spontaneous firing rates of isolated single-units in layers Va, Vb and VI of the  
968 hindlimb motor cortex in control rats (n=5) and rats with a spinal cord contusion at T9-10  
969 (n=14). Laminar estimates are based on the depths of electrode sites on a single-shank  
970 multi-electrode array relative to the cortical surface<sup>26</sup>. In each rat, single-unit (spike)  
971 activity was sampled from 4 to 6 locations within neurophysiologically-identified  
972 hindlimb motor cortex. Data represent the mean firing rates of 1,744 isolated units in  
973 Layers Va (control, n=124; SCI, n=312), Vb (control, n=155; SCI, n=390), and VI  
974 (control, n=217; SCI, n=546). Two-tailed t-test,  $t=3.99$ , \*\*\*\*  $p<0.0001$ .

975

976 **Fig. 5: Distal axotomy induces culture-wide loss of inhibitory terminals and**  
977 **increased frequency of spontaneous release events at GABAergic terminals.**

978 **(a)** Representative images of fixable FM4-64FX puncta (red) and vGLUT1 (green) co-  
979 immunolabeling in uninjured chambers and 48h following axotomy. White circles  
980 highlight vGLUT1 expression at FM-labeled terminals. Scale bars, 10  $\mu\text{m}$ . Fraction of  
981 vGLUT1+ FM puncta per neuron field at 48h post-axotomy normalized to uninjured  
982 controls. n=18 neuron fields; 5 chambers over 3 experiments. **(b)** Fixable FM4-64FX  
983 puncta (red) and GAD67 (green) co-immunolabeling. Quantification of GAD67-positive  
984 FM puncta at 48h post-axotomy normalized to control. n=21 neuron fields; 5 chambers  
985 over 3 experiments. **(c)** Number of vGLUT1 and vGAT puncta per neuron area  
986 (axotomized or control) 48 h post-axotomy. n=8-9 neurons; 3 chambers per condition  
987 over 3 experiments. **(a-c)** Unpaired two-tailed t-test. **(d)** Representative traces of mIPSC  
988 recordings 48 h post-axotomy. **(e)** Quantification of mIPSC frequency and amplitude 48h  
989 post-axotomy (control, n=9 neurons; axotomy, n=17 neurons). (mIPSC frequency:

990 unpaired two-tailed t-test with Welch's correction,  $p = 0.05$ ; mIPSC amplitude: unpaired  
991 two-tailed t-test,  $p = 0.62$ ). **(f)** Analysis of mIPSC frequency and amplitude from  
992 axotomized devices previously shown in *(e)* comparing neurons with axons that extended  
993 into the axonal compartment and were cut (cut,  $n=8$  neurons), to neurons that did not  
994 extend axons into the compartment and were not cut (uncut,  $n=9$  neurons). (mIPSC  
995 frequency: unpaired two-tailed t-test,  $p = 0.94$ ; mIPSC amplitude: unpaired two-tailed t-  
996 test,  $p = 0.51$ ). *(d-f)* Data shown were combined from 3 chambers. **(g)** Representative  
997 dendritic segments (retrogradely labeled with eGFP rabies virus) showing spines that are  
998 labeled with vGLUT1 (red) or vGAT (magenta) antibodies. White open circles highlight  
999 dendritic spines with vGLUT1 and/or vGAT synapses. **(h)** Fraction of vGLUT1- and  
1000 vGAT-positive spines at 24h post-axotomy.  $n=12-14$  neuron fields; 7 neurons per  
1001 condition; #spines: 458 (uninj. cntl), 394 (axot.); 3 chambers over 3 experiments. **(i)**  
1002 Fraction of vGLUT1- and vGAT- positive spines at 48 h post-axotomy.  $n=11-15$  neuron  
1003 fields; 8-9 neurons per condition; #spines: 460 (uninj. cntl), 413 (axot.); 3 chambers over  
1004 3 experiments. Scale bars, 5  $\mu\text{m}$ . Unpaired two-tailed t-test.  $**p < 0.01$ ,  $***p < 0.001$ .  
1005 Error bars, s.e.m.

1006

1007 **Fig. 6: Injury-induced synaptic remodeling is triggered by retrograde propogation**  
1008 **of injury signaling from axon-to-soma and gene transcription.**

1009 **(a)** Representative images of neurons within microfluidic chambers retrograde labeled  
1010 with eGFP rabies virus (inverted grayscale) before and 24h post-axotomy with vehicle or  
1011 local activity blockade solution (ABS) applied to axons for 1h during axotomy. Inset  
1012 shows zoomed in dendritic regions. Image and inset scale bars, 50 and 5  $\mu\text{m}$ ,

1013 respectively. **(b)** Quantification of before and after spine density data described in (a).  
1014 *Axotomy (vehicle)*: n=29 dendrites; 5 neurons; 3 chambers over 3 experiments;  
1015 #spines/TDL: 437/4185 $\mu$ m (before), 274/3868 $\mu$ m (after). *Axot. (ABS)*: n=33 dendrites; 5  
1016 neurons; 3 chambers over 3 experiments; #spines/TDL: 426/3889 $\mu$ m (before),  
1017 446/3700 $\mu$ m (after). **(c)** Quantification of spine density changes following application of  
1018 transcription blocker (DRB) to the somatodendritic compartment for 1h during axotomy  
1019 within microfluidic chambers. *DRB (uninj.)*: n=27 dendrites; 6 neurons; 3 chambers over  
1020 3 experiments; #spines/TDL: 362/4186 $\mu$ m (0h), 262/3934 $\mu$ m (24h after). *DRB (axot.)*:  
1021 n=28; 6 neurons; 3 chambers over 3 experiments; #spines/TDL: 343/3414 $\mu$ m (before)  
1022 283/3248 $\mu$ m (after). (b,c) Unpaired two-tailed t-test, 24h post-axotomy **(d)** Percentage of  
1023 responsive and unresponsive FM puncta at 48h post-axotomy. n=6 neuron  
1024 fields/chambers per condition over 3 experiments. Unpaired two-tailed t-test, %  
1025 responsive. **(e)** FM 5-95 unloading following 1h application of DRB during  
1026 axotomy/control. *Uninj. DRB*: n=1580 puncta; 6 chambers per condition over 3  
1027 experiments. *Axot. DRB*: 2213 puncta; 6 chambers per condition over 3 experiments. **(f)**  
1028 Percent of responsive and unresponsive puncta at 48h post-axotomy following  
1029 application of TTX to the somatodendritic compartment for 1 h during injury. n=6 neuron  
1030 fields/chambers per condition over 3 experiments. Unpaired two-tailed t-test, %  
1031 responsive. **(g)** FM unloading curves following application of TTX. *Uninj. TTX*: n=1360  
1032 puncta; 6 chambers per condition over 3 experiments. *Axot. TTX*: n=1648 puncta; 6  
1033 chambers per condition over 3 experiments. Two-way ANOVA, Bonferroni post-hoc test.  
1034 \*p<0.05, \*\*p<0.01, \*\*\*p<0.001, \*\*\*\* p<0.0001. Error bars, s.e.m.  
1035

1036 **Fig. 7: Netrin-1 gene expression is differentially regulated within the**  
1037 **somatodendritic compartment following axotomy in microfluidic cultures and in**  
1038 **vivo following spinal cord hemi-transection.** Microarray analysis was performed on  
1039 somatodendritic samples of uninjured controls and 24h post-axotomy cultures. Quality  
1040 control data is presented in **Supplementary Fig. 5.** (a) Volcano plot showing  
1041 differentially expressed RNAs that are significantly changed at 24h post-axotomy (One-  
1042 way between-subject ANOVA; n=3 individual chambers each condition; **Supplementary**  
1043 **Table 2).** (b) Microarray expression levels for *Ntn-1* within microfluidic chambers (left)  
1044 and for housekeeping genes *Odc1* and *GAPDH* (*right*). One-way between-subject  
1045 ANOVA. (c) Microarray expression levels for *Ntn-1* (left) and *Odc1* and *GAPDH* (right)  
1046 in cortical layers V/VI following hemi-transection at thoracic level 8. n=4 animals per  
1047 group. *Ntn-1* levels are significantly reduced by 7 days following injury. Two-way  
1048 ANOVA, Sidak's multiple comparisons test. \*p<0.05. Error bars, s.e.m.

1049

1050 **Fig. 8: Exogenous netrin-1 normalizes synaptic changes following distal axotomy.** (a)  
1051 Representative dendrites before and 48h post-axotomy treated with vehicle (HBS) or  
1052 netrin-1 (*Ntn1*) beginning at 40h post-axotomy (inverted fluorescence). Arrows: new  
1053 spines; red astericks: eliminated spines. Scale bars, 10  $\mu\text{m}$ . (b) Quantification of spine  
1054 density illustrated in (a). *Axotomy*: n=33 dendrites; 7 neurons; #spines/TDL: 392/3696 $\mu\text{m}$   
1055 (before), 263/3447 $\mu\text{m}$  (after). *Axotomy+netrin-1*: n=29 dendrites, 6 neurons;  
1056 #spines/TDL: 293/3281 $\mu\text{m}$  (before), 363/3417 $\mu\text{m}$  (after). (c) Percent responsive FM  
1057 puncta per neuron field at 48h post-axotomy with HBS or netrin-1. n=8-11  
1058 fields/chambers per condition over 5 experiments. (d) Number of responsive and



1059 unresponsive FM puncta from (c). Significantly fewer unresponsive puncta followed  
1060 axotomy compared to uninjured control (HBS). (e-f) Number of vGLUT1 and vGAT  
1061 puncta per neuron area (uninjured control, axotomized+HBS, or axotomized+netrin-1) at  
1062 14 DIV. n=8-9 neurons; 3 chambers per condition over 3 experiments. (g) Representative  
1063 DCC immunostaining (turquoise) in uninjured control, post-axotomy, and post-  
1064 axotomy+netrin-1 in cultures with similar spine densities. Neurons were retrogradely  
1065 labeled with fluorescent protein (FP, magenta) using an mCherry modified rabies virus.  
1066 Scale bar, 10  $\mu$ m. (h) Quantification of DCC immunofluorescence per spine region-of-  
1067 interest (ROI). ROI: 2 $\mu$ m diameter circular region surrounding each spine. Control,  
1068 n=295 ROIs; axotomy, n=293 ROIs; axotomy+Ntn1, n=210 ROIs. 8 neuron fields/3  
1069 chambers per condition; 3 experiments. (i) Quantification of spine density following 24h  
1070 of control antibody (IgG ab.) or DCC function blocking antibody (DCC ab.). IgG: n=33  
1071 dendrites; 8 neurons; #spines/TDL: 464/4864 $\mu$ m (before), 419/4712 $\mu$ m (after). DCC ab:  
1072 n=34 dendrites; 7 neurons; #spines/TDL: 404/4433 $\mu$ m (before), 222/3647 $\mu$ m (after). (j)  
1073 Representative FP-labeled dendritic segments immunostained for vGAT (inverted) and  
1074 vGLUT1 (inverted) following 24h application of IgG or DCC antibodies (outlined  
1075 dendrites, solid magenta line). Neurons were fixed at 15-16 DIV, older than the cultures  
1076 in (e,f). Scale bar, 10  $\mu$ m. Quantification shown on the right. n=23 neuron fields per  
1077 condition; 3 chambers per condition over 3 experiments. (b,i) Repeated-measure two-way  
1078 ANOVA, Bonferroni post-hoc test; analyses included 1 chamber per condition for 3  
1079 experiments. (c,j) Unpaired two-tailed t-test. (d-f,h) One-way ANOVA, Bonferroni post-  
1080 hoc test. Error bars, s.e.m. \*p<0.05, \*\*\*\*p<0.0001  
1081

1082 **Supplementary Figures and Tables:**

1083 **Supplementary Fig. 1:** Distal axotomy of pyramidal neurons induces dissolution of  
1084 Nissl substance without affecting cell viability.

1085 **Supplementary Fig. 2:** FM puncta colocalize with synapsin1 immunolabeling.

1086 **Supplementary Fig. 3:** FM unloading curves for (1) somatodendritic compartments, near  
1087 the microgrooves of microfluidic chambers without retrograde labeling, and (2) cortical  
1088 and targeted neuron populations subjected to axotomy.

1089 **Supplementary Fig. 4:** Fluorescence micrograph of a dually innervated dendritic spine  
1090 receiving both excitatory and inhibitory inputs.

1091 **Supplementary Fig. 5:** RNA quality assessment and verification of microarray quality  
1092 controls.

1093 **Supplementary Table 1:** Membrane properties of uninjured controls vs. axotomized  
1094 neurons 48 h post-axotomy

1095 **Supplementary Table 2:** List of transcripts that were significantly changed 24 h after  
1096 injury.

1097 **Supplementary Table 3:** Cell-cell adhesion transcripts changed 24 h after injury ( $p <$   
1098 0.1)

1099

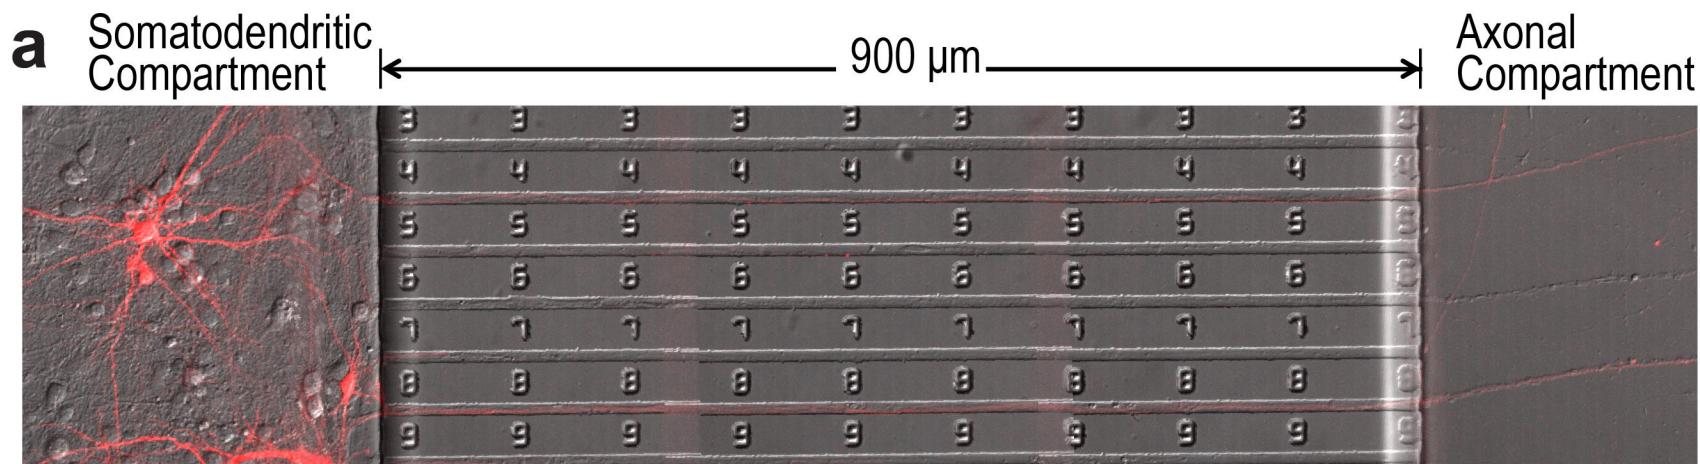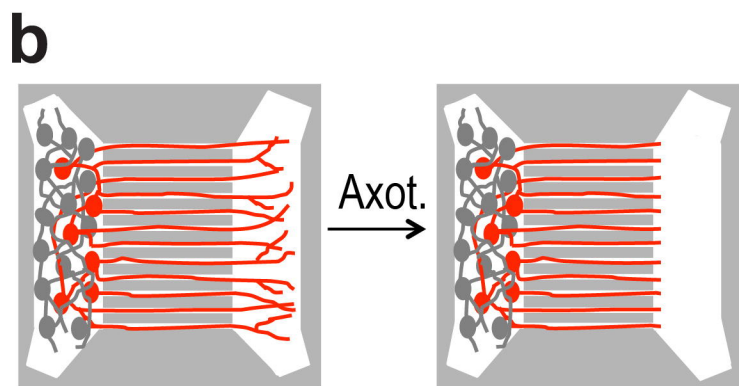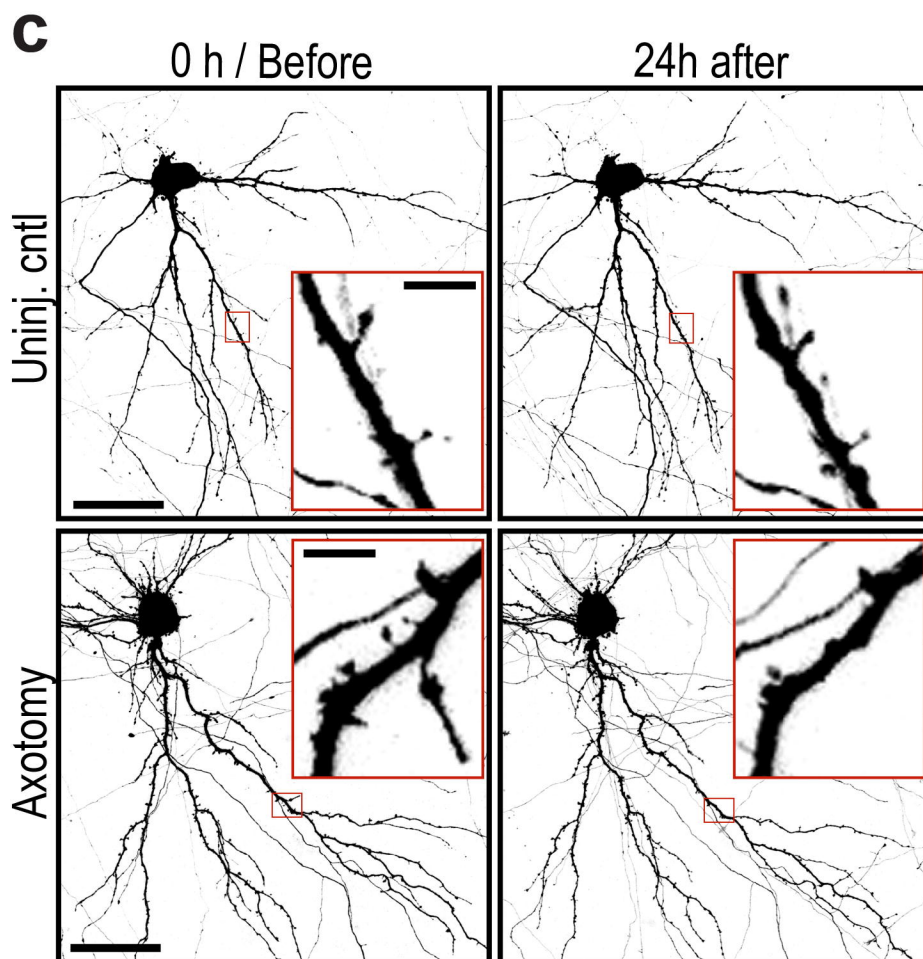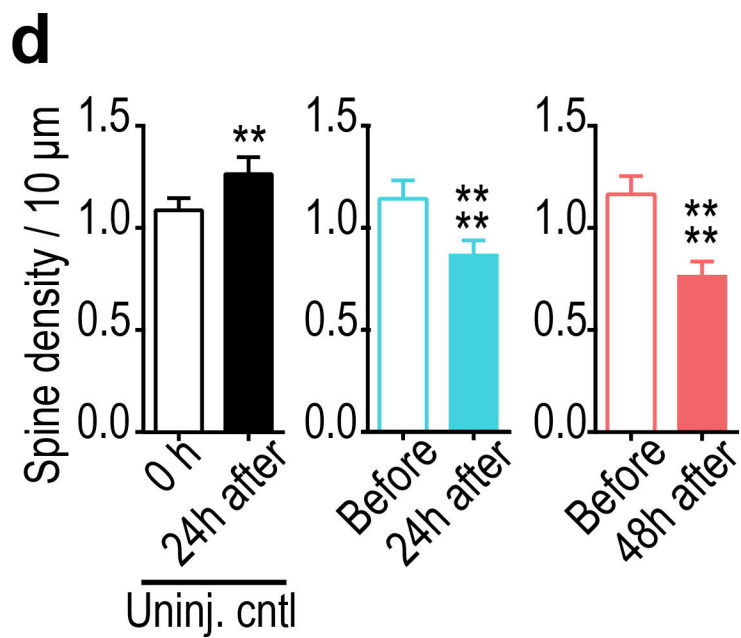

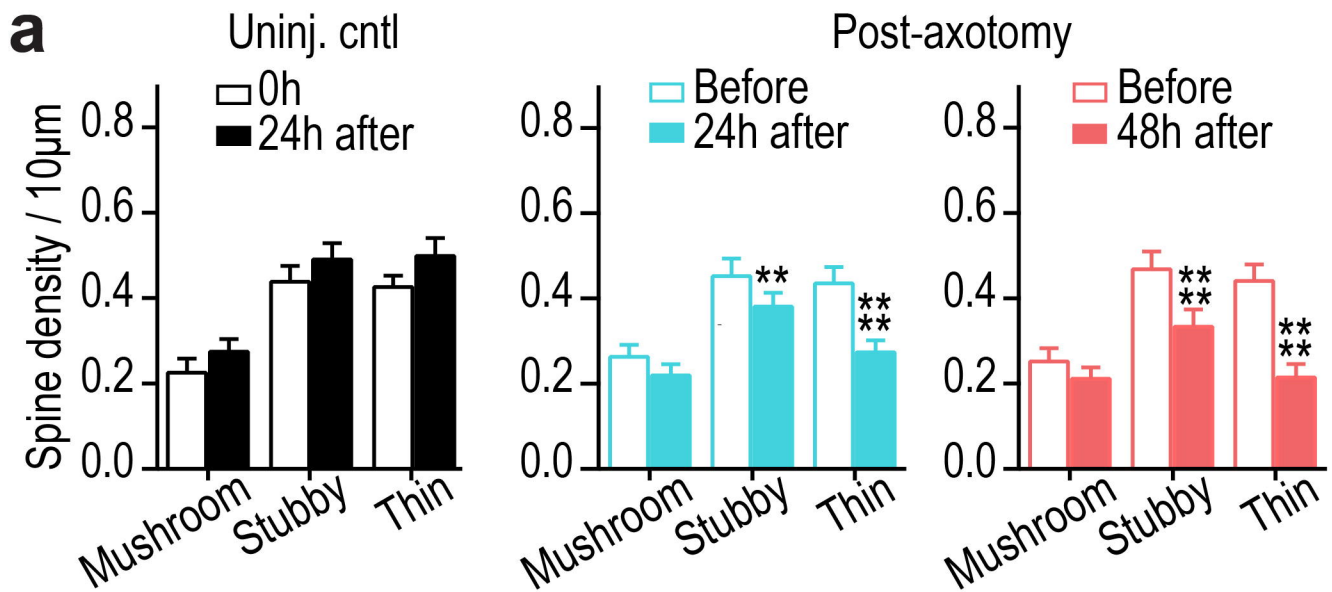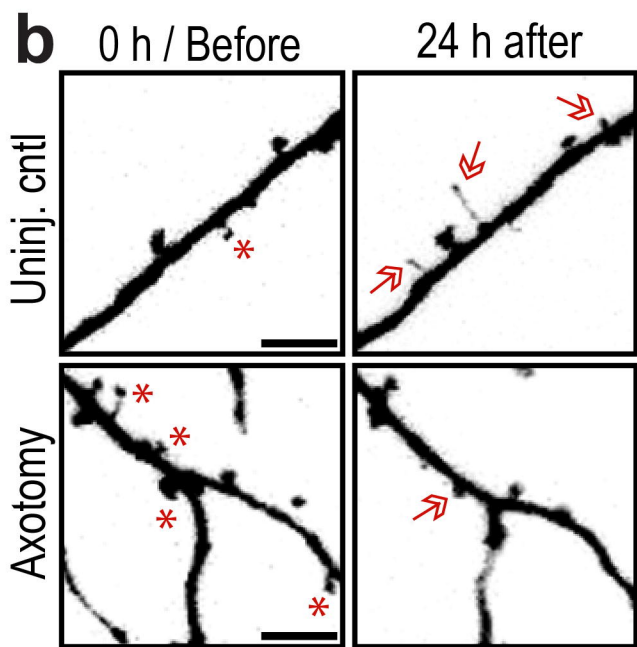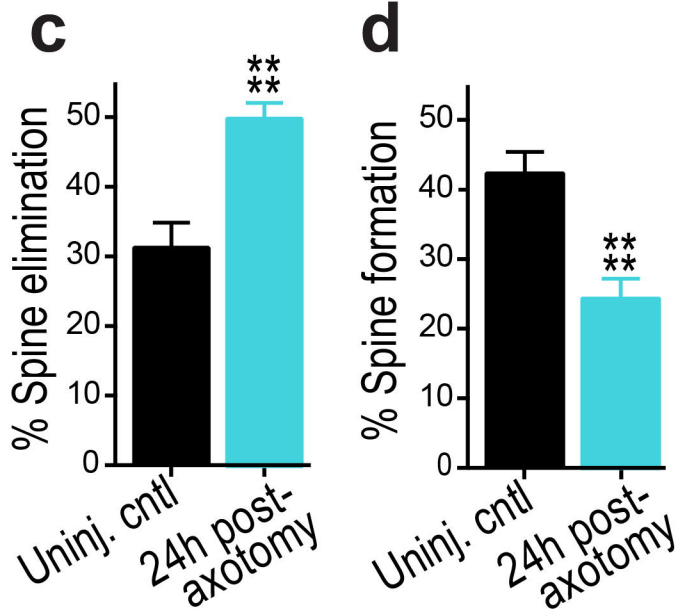

**a**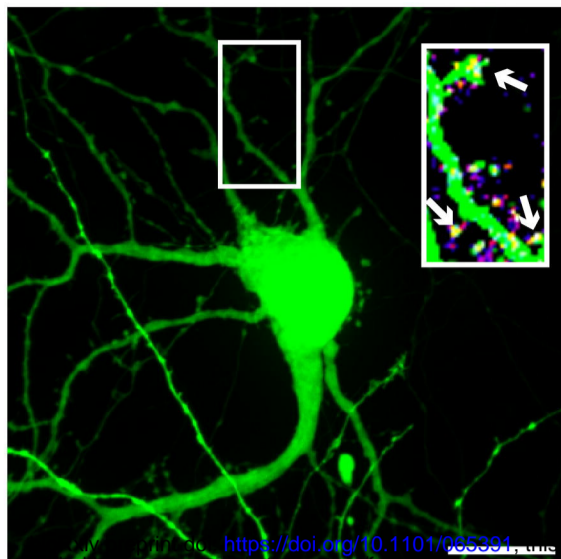**b**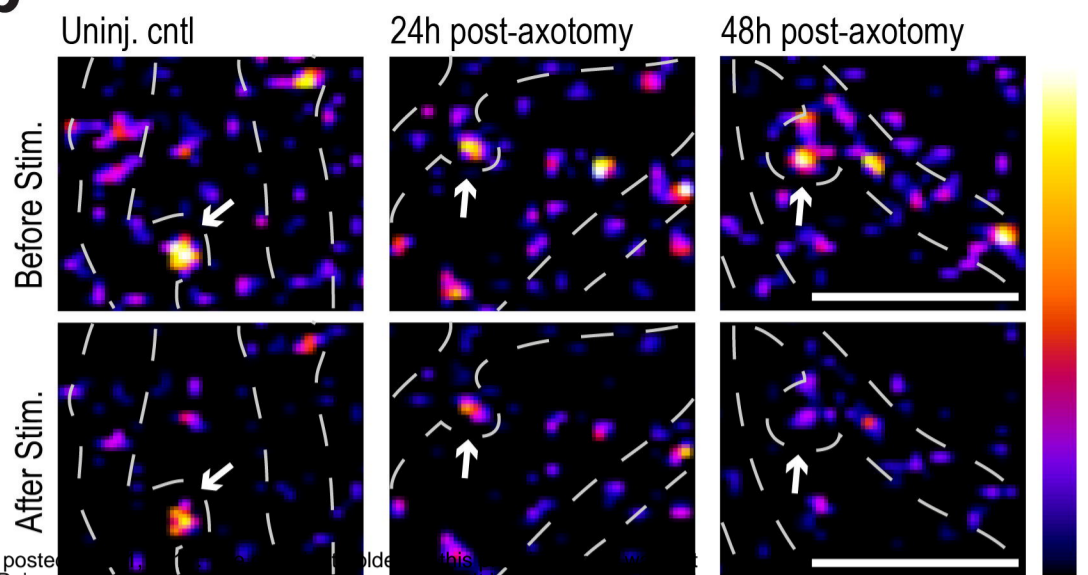**c**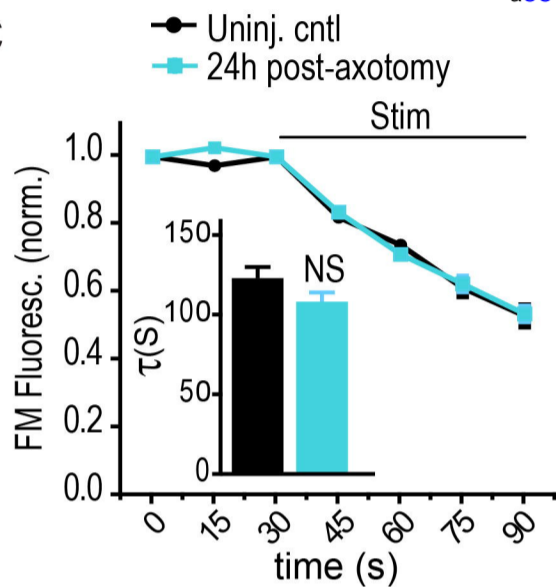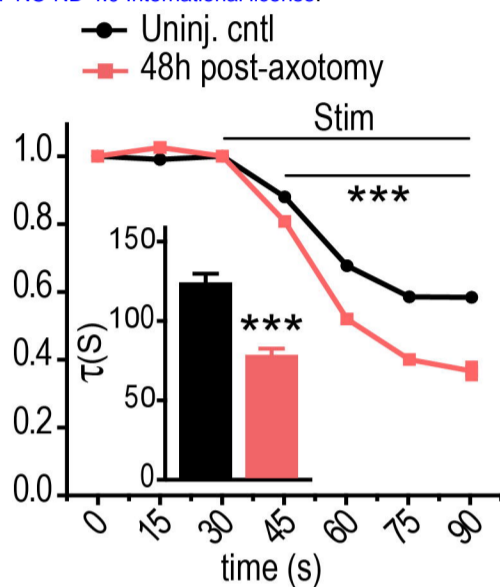**d**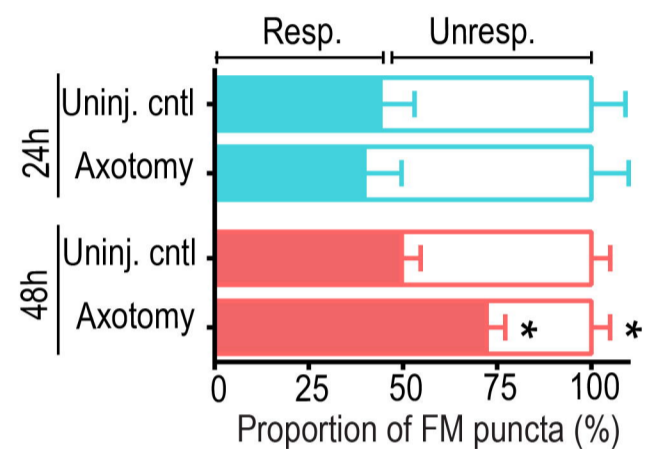**e**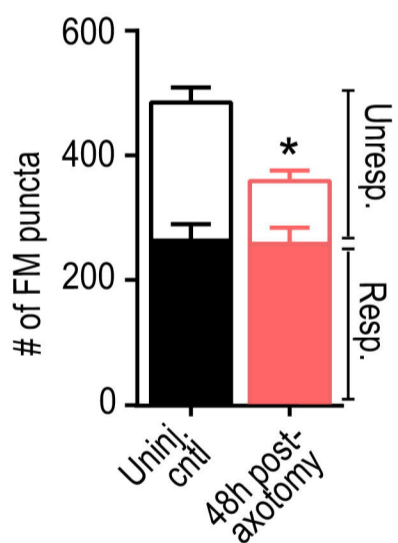**f**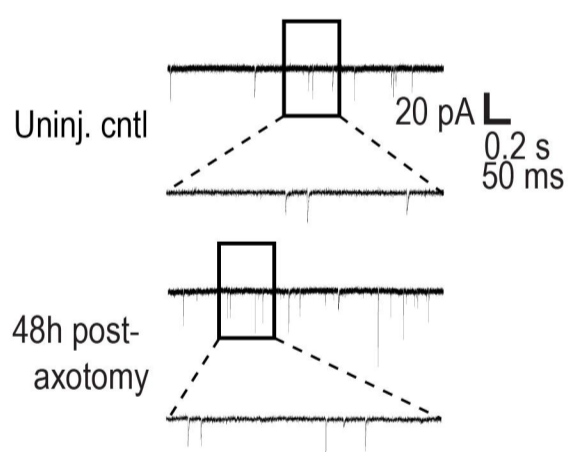**g**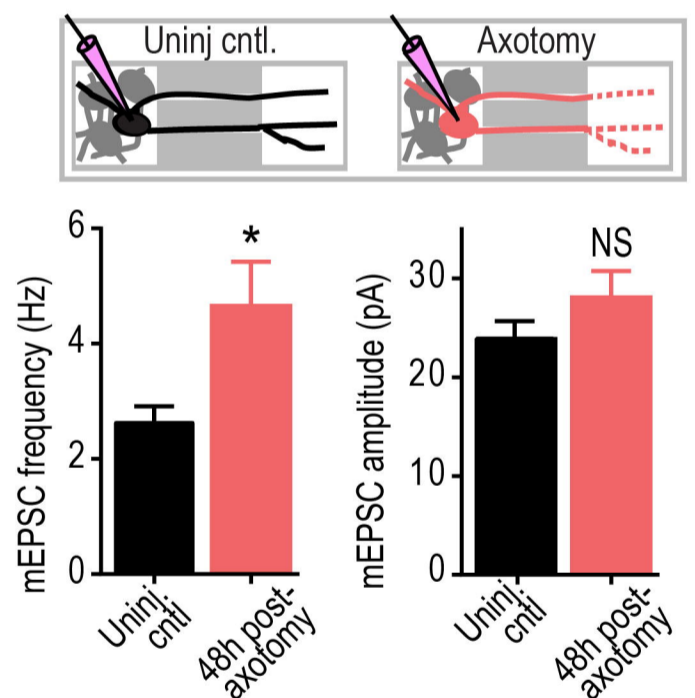**h**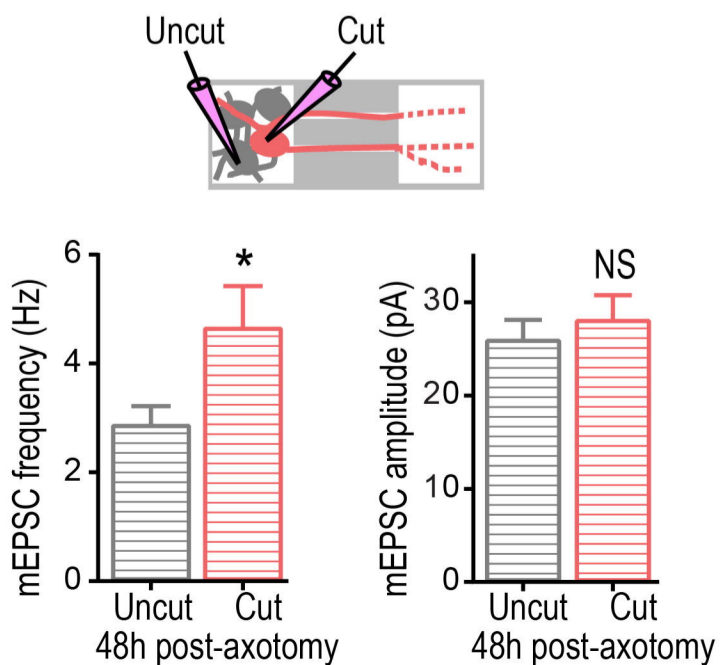**i**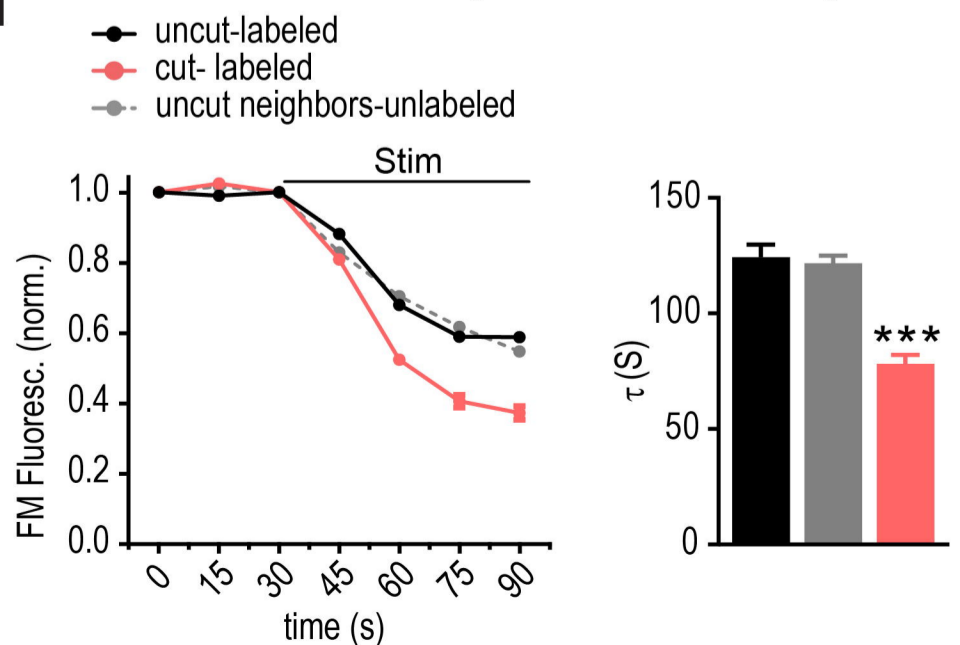

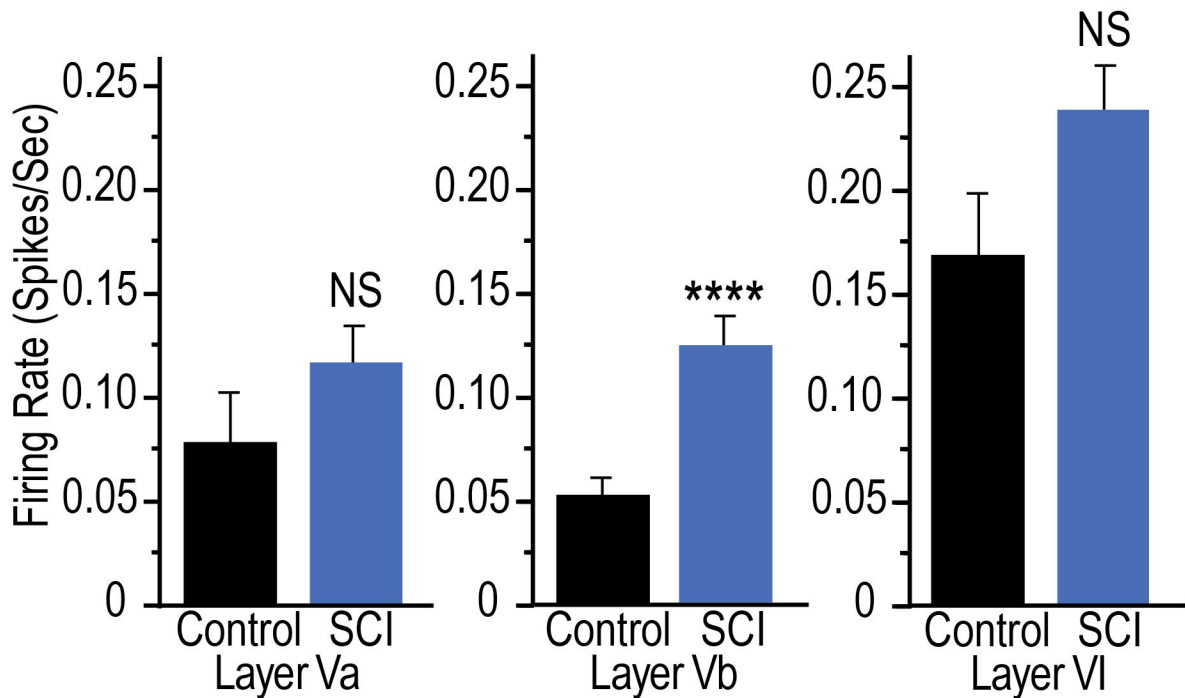

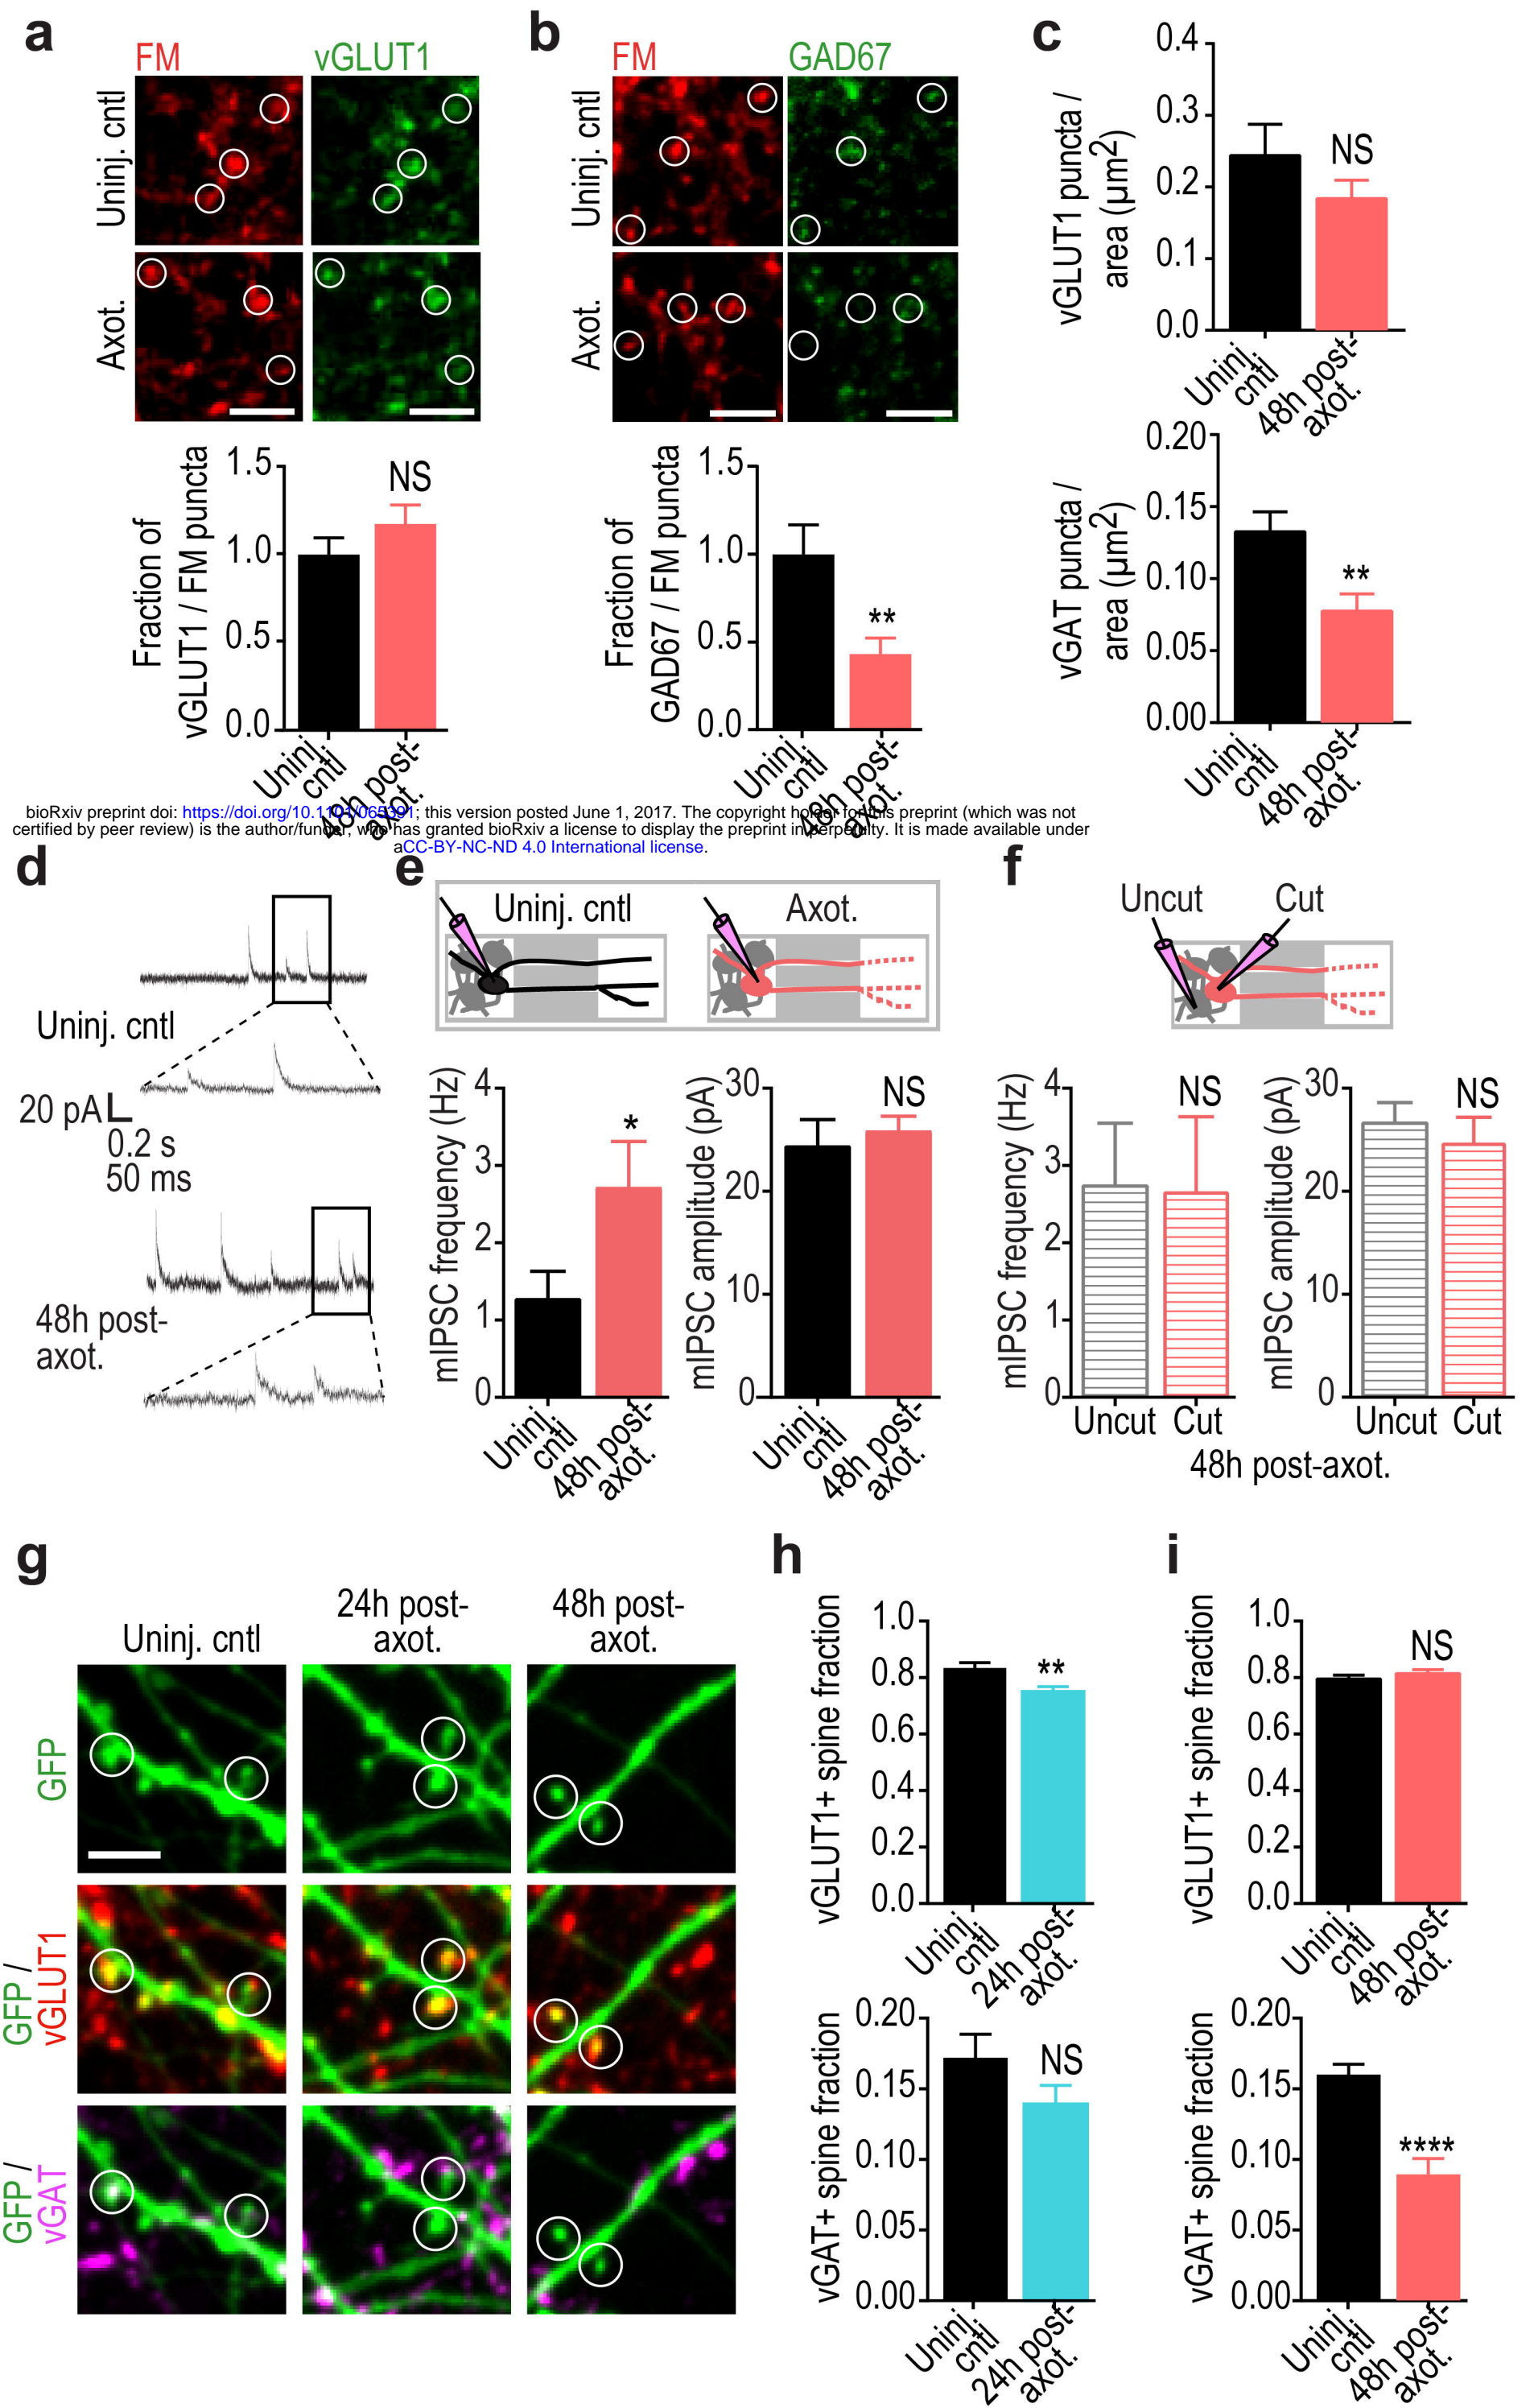

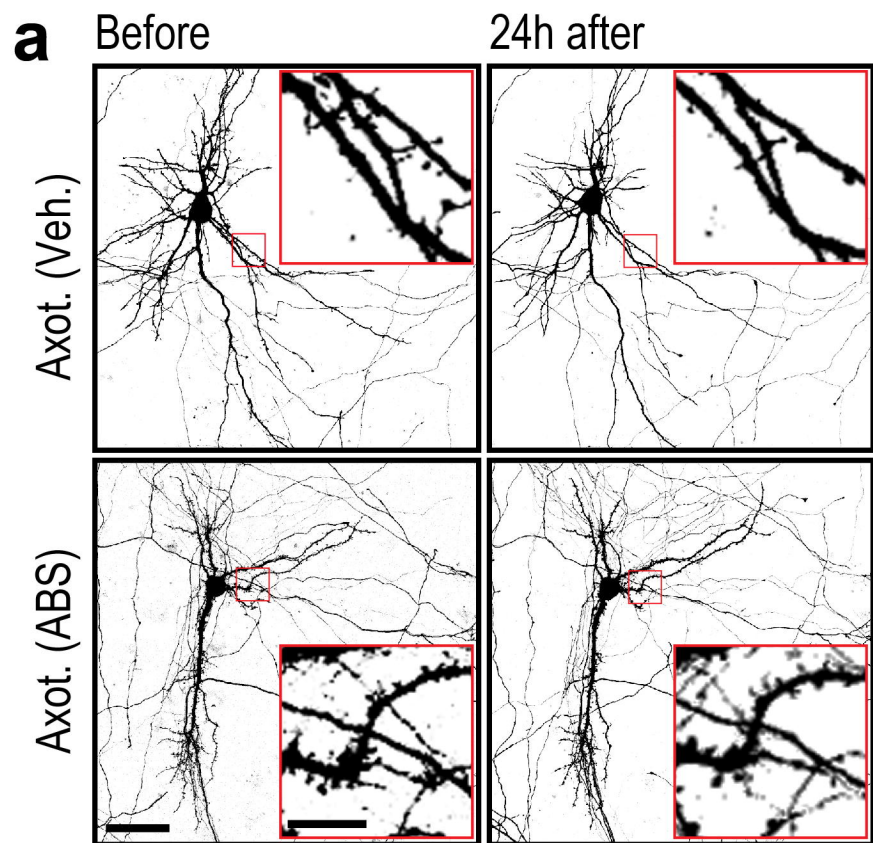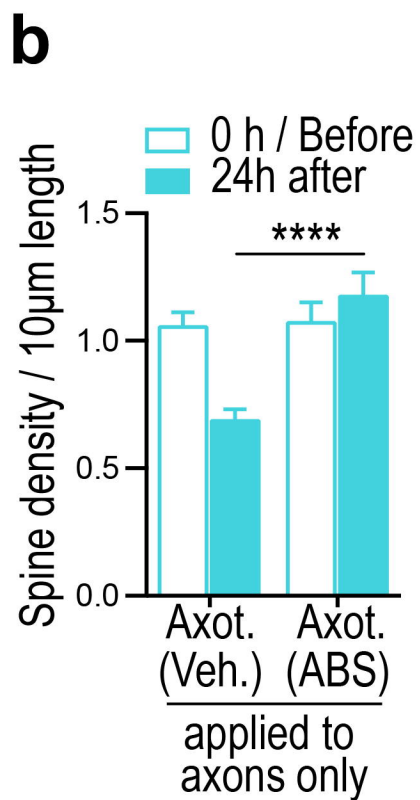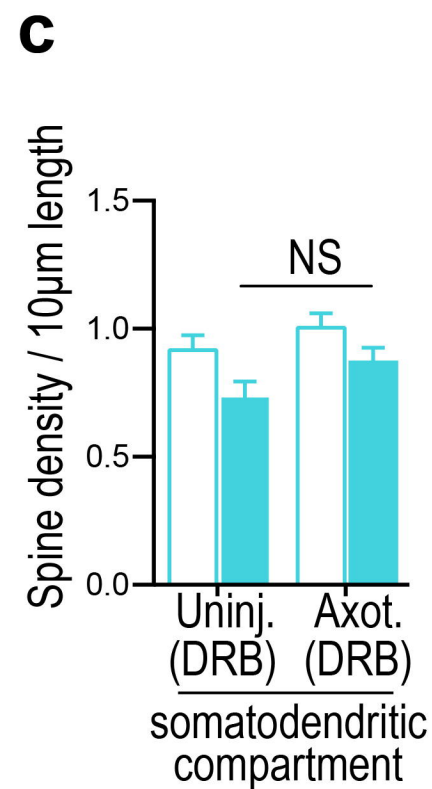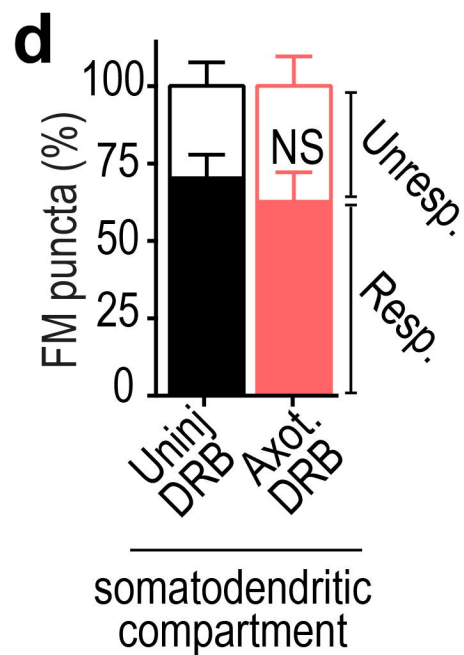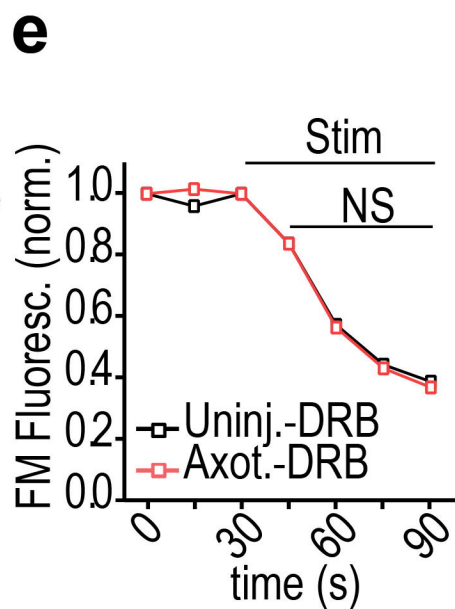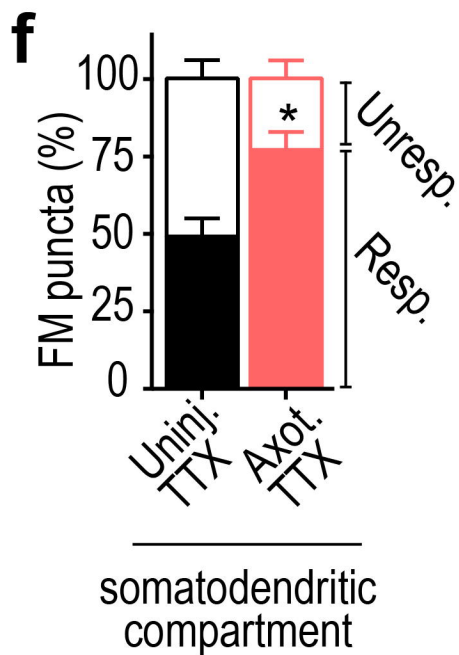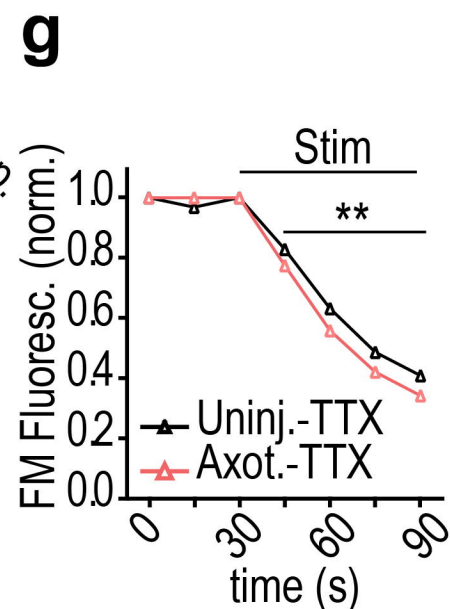



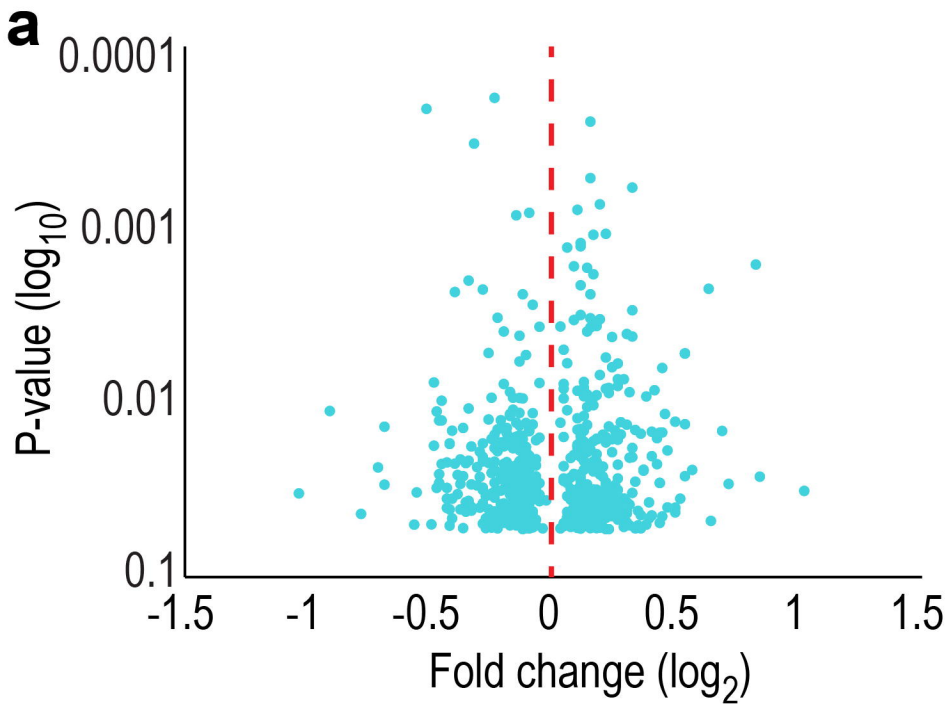

**b**

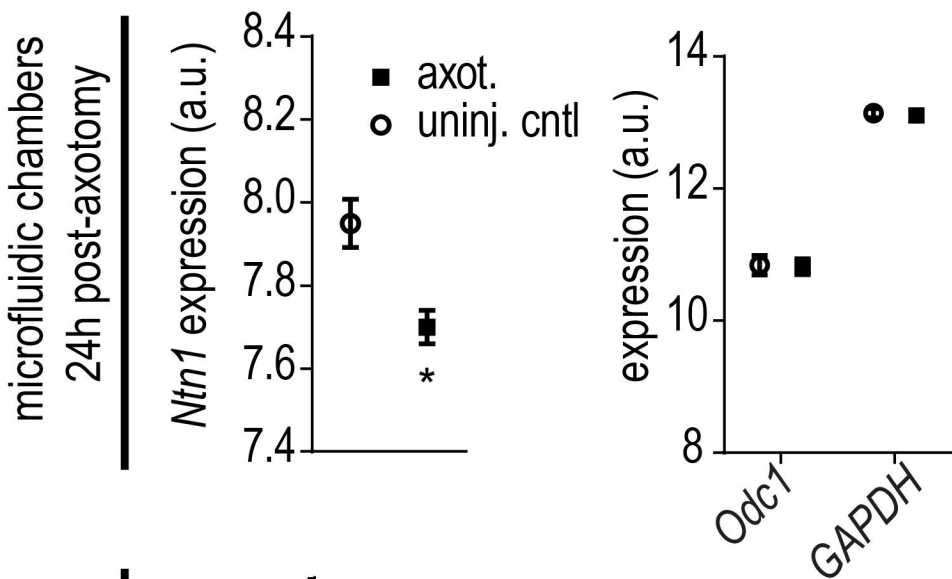

**c**

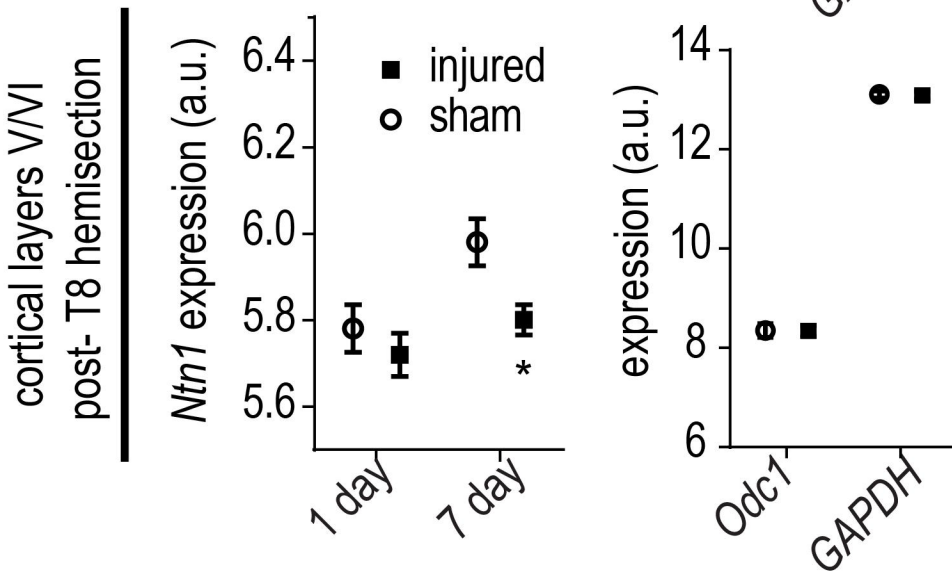

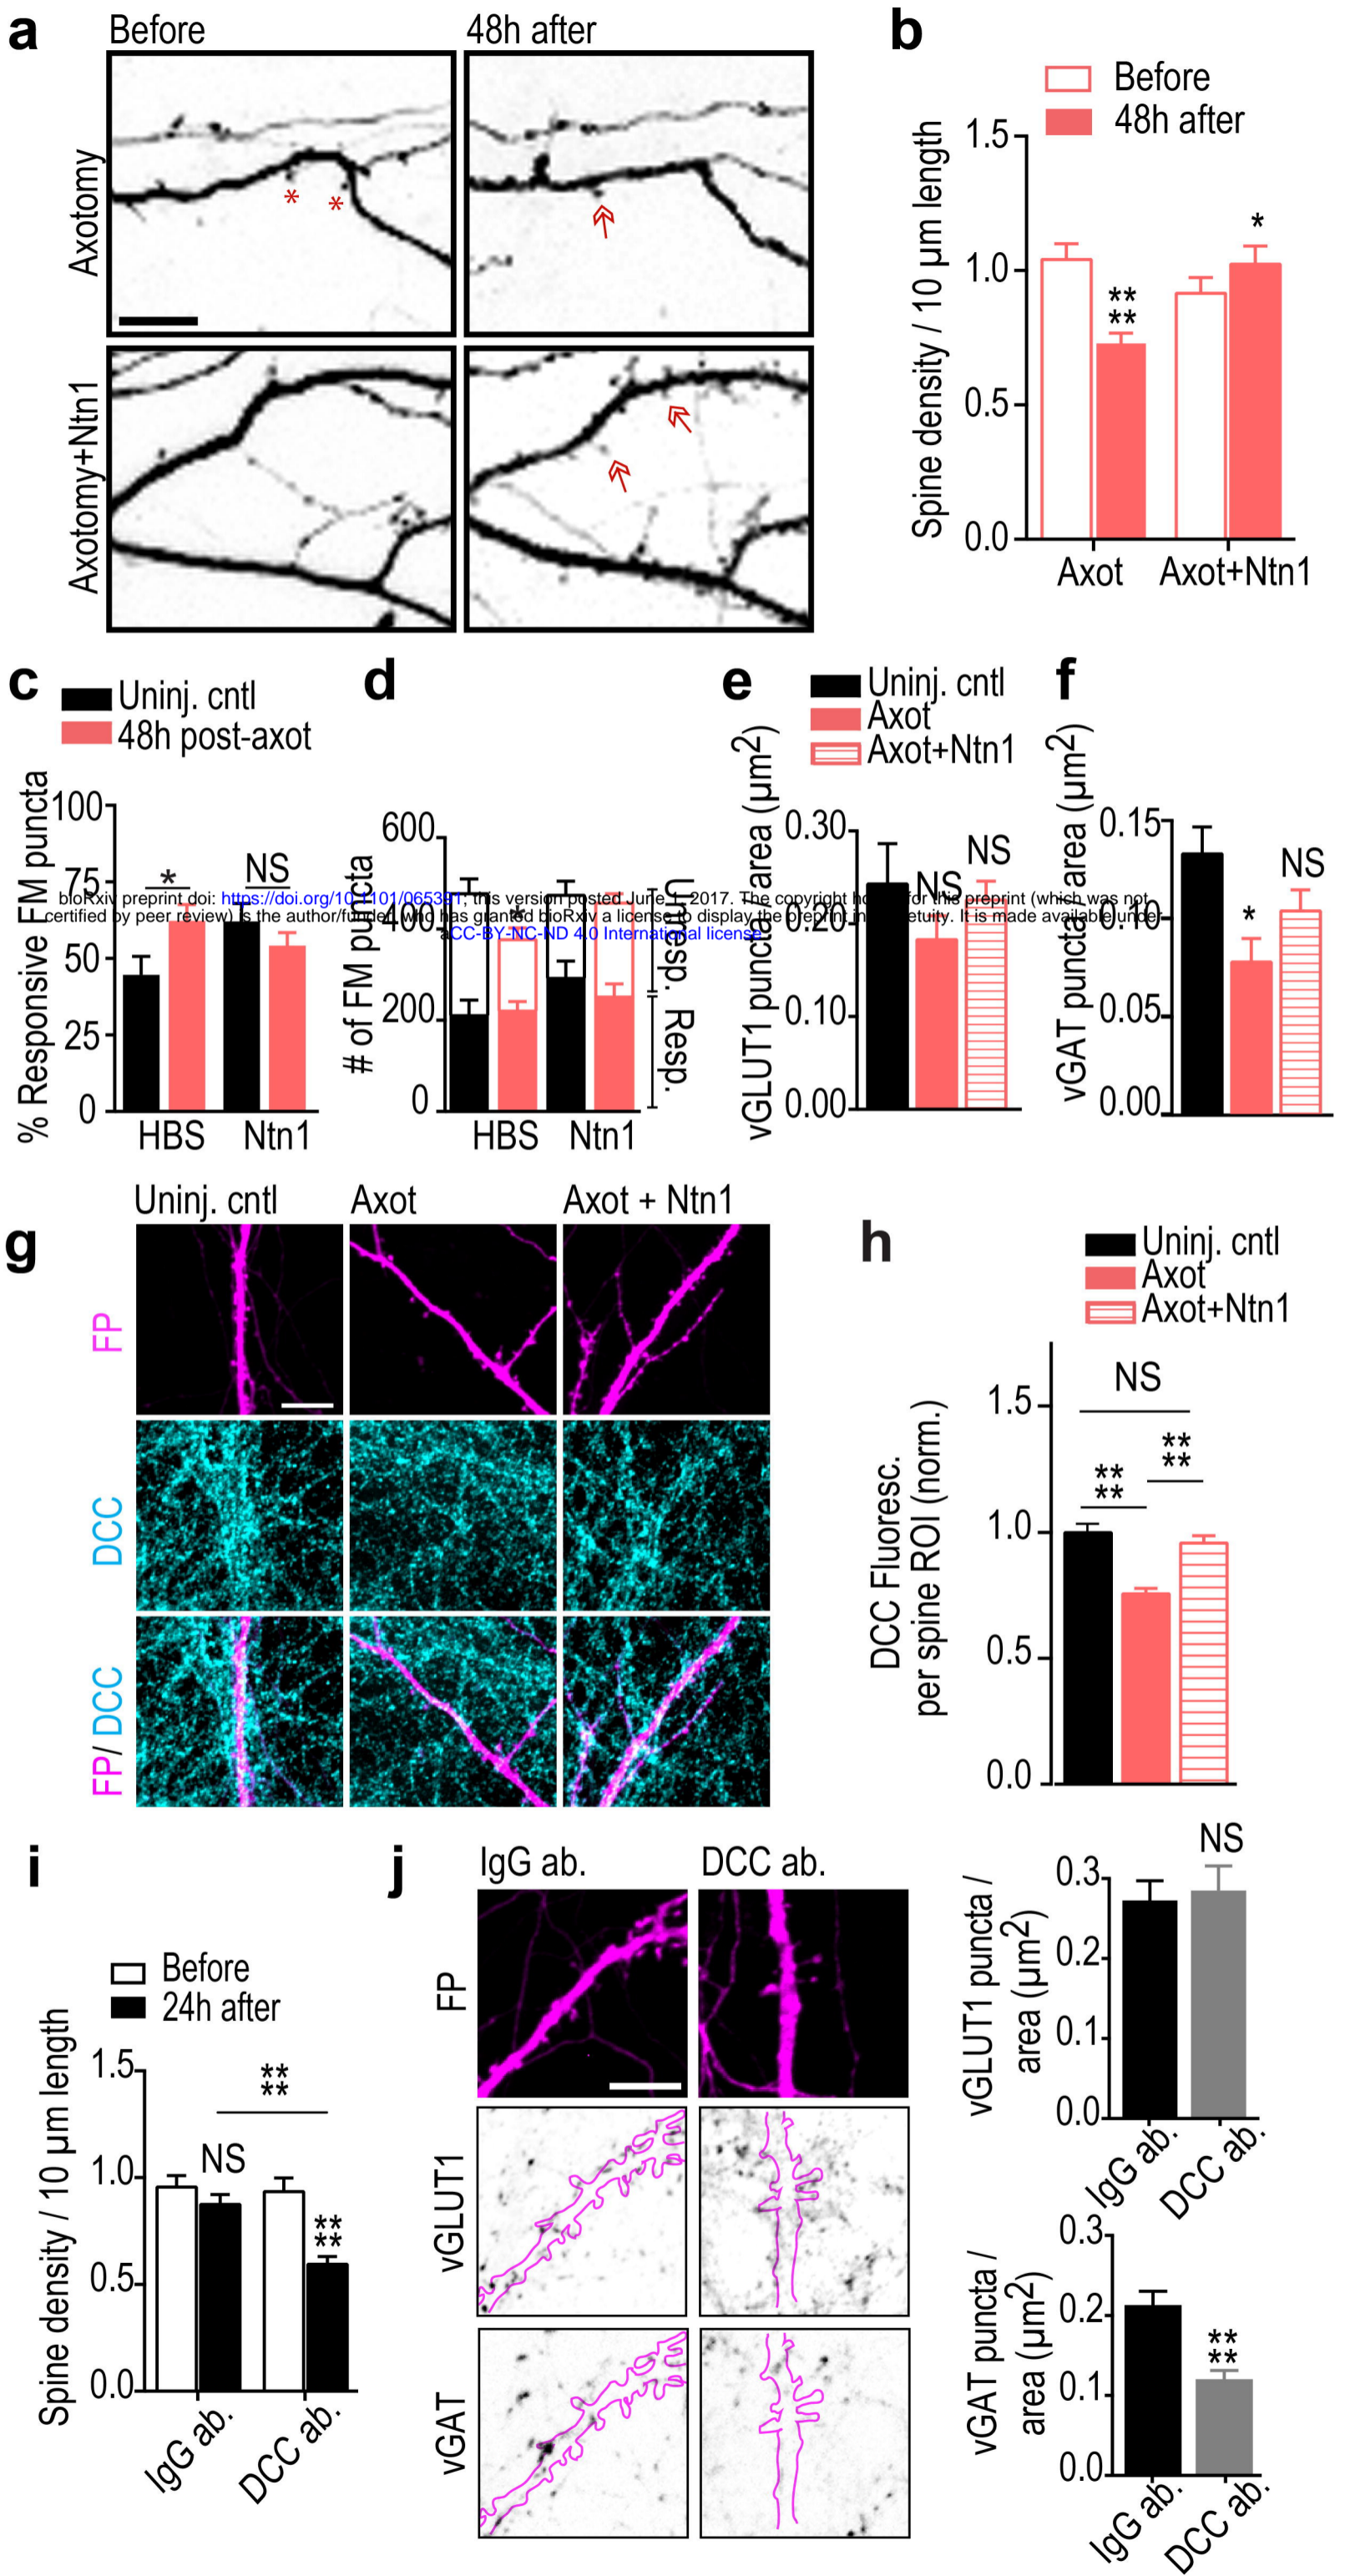

Source: https://www.biorxiv.org/content/10.1101/065391v4.full.pdf
